# Supplementary material for: Camrelizumab, apatinib plus induction chemotherapy and concurrent chemoradiotherapy in stage N3 nasopharyngeal carcinoma
Source: Research Square preprint supplement (doi:10.21203/rs.3.rs-3303427/v1), 2023-09-12
Supplement: Supplementary file 2 [file 741d63c39649160156270f0a.docx]

Trial Protocol

This supplement contains the following items:

1. Original protocol (*Page 7-47*), final protocol (*Page 48-88*), summary of changes (*Page 89*).

2. Original statistical analysis plan (*Page 90-92*), final statistical analysis plan (*same with the original version*), summary of changes (*no changes*).

**Table of Contents**

[First approved version: April 25, 2020 7](#_Toc118162418)

[1 Background 8](#_Toc118162419)

[2 Objectives 9](#_Toc118162420)

[2.1 Primary Objectives 9](#_Toc118162421)

[2.2 Secondary Objectives 9](#_Toc118162422)

[3 Trial Scheme 10](#_Toc118162423)

[4 Subject Enrollment 11](#_Toc118162424)

[4.1 Eligibility Criteria 11](#_Toc118162425)

[4.2 Exclusion Criteria 11](#_Toc118162426)

[4.3 Criteria for withdrawal from protocol treatment 13](#_Toc118162427)

[5 Treatment Plan 13](#_Toc118162428)

[5.1 Pretreatment Assessment 13](#_Toc118162429)

[5.2 Pretreatment Staging Criteria 14](#_Toc118162430)

[5.3 Chemotherapy, target and immunotherapy 15](#_Toc118162431)

[5.4 Radiotherapy 16](#_Toc118162432)

[5.4.1 Radiation Therapy 16](#_Toc118162433)

[5.4.2 Target Volume Determination for IMRT 16](#_Toc118162434)

[5.4.3 Prescribed Dose and Fractionation 18](#_Toc118162435)

[5.4.4 Normal Tissue Dose Constraints 18](#_Toc118162436)

[5.4.5 Radiotherapy Adjustments for Non-hematological Toxicity 19](#_Toc118162437)

[5.4.6 Radiotherapy Adjustments for Hematological Toxicity 19](#_Toc118162438)

[5.5 Salvage Therapy 19](#_Toc118162439)

[6 Dosage Adjustment Principle for chemotherapy 19](#_Toc118162440)

[6.1 General principle for dosage adjustment 19](#_Toc118162441)

[6.2 Dosage adjustment due to hematologic adverse events 20](#_Toc118162442)

[6.3 Dosage adjustment due to non-hematologic adverse events 22](#_Toc118162443)

[6.3.1 NAB-paclitaxel 22](#_Toc118162444)

[6.3.2 Cisplatin 23](#_Toc118162445)

[6.3.3 Capecitabin 24](#_Toc118162446)

[6.3.4 Apatinib 25](#_Toc118162447)

[6.3.5 Camrelizumab 27](#_Toc118162448)

[7 Concomitant Medication or Treatment 29](#_Toc118162449)

[7.1 Application of Antiemetic Drugs 29](#_Toc118162450)

[7.2 Application of Granulocyte Colony-stimulating Factor (G-CSF) 29](#_Toc118162451)

[7.3 Combined drug usage and treatment 30](#_Toc118162452)

[7.3.1 Permissible Treatment 30](#_Toc118162453)

[7.3.2 Inadmissible Treatment 30](#_Toc118162454)

[8 Observation and Assessment During Treatment 30](#_Toc118162455)

[9 Exploratory analysis and translational study 31](#_Toc118162456)

[9.1 Exploratory analysis 31](#_Toc118162457)

[9.2 Translational study 31](#_Toc118162458)

[10 Safety Evaluation 32](#_Toc118162459)

[10.1 Adverse Event Indicators 32](#_Toc118162460)

[10.2 Severe Adverse Events (SAEs) 32](#_Toc118162461)

[10.3 Record of Events 33](#_Toc118162462)

[11 Follow Up 34](#_Toc118162463)

[12 Safety Measures and Quality Control 34](#_Toc118162464)

[13 Data Collection and Data Management 35](#_Toc118162465)

[13.1 Case Report Form (CRF) 35](#_Toc118162466)

[13.2 Data Entry and Modification 35](#_Toc118162467)

[13.3 Data Locking 36](#_Toc118162468)

[14 Statistical Analysis 36](#_Toc118162469)

[14.1 Endpoint Definitions 36](#_Toc118162470)

[14.1.1 Primary End Point 36](#_Toc118162471)

[14.1.2 Secondary End Points 36](#_Toc118162472)

[14.2 Determination of the Sample Size 38](#_Toc118162473)

[14.3 Analytical Approach 38](#_Toc118162474)

[15 Ethical Considerations 39](#_Toc118162475)

[16 Administration of Experimental Drugs 39](#_Toc118162476)

[17 Progress of Study 40](#_Toc118162477)

[18 Principle center and investigator 40](#_Toc118162478)

[19 Bibliography 41](#_Toc118162479)

[Appendix I: The 8th editions of the AJCC Staging System of Nasopharyngeal Carcinoma 43](#_Toc118162480)

[Appendix II: ECOG Performance Status and Scores 44](#_Toc118162481)

[Appendix III: Acute Induction Chemotherapy and Chemoradiotherapy Toxicity Graded by Common Terminology Criteria for Adverse Events (CTCAE 5.0). 45](#_Toc118162482)

[Appendix IV: Late Onset Toxicities Graded by RTOG/EORTC System 46](#_Toc118162483)

[Final protocol (Second version: March 20, 2021) 48](#_Toc118162484)

[1 Background 49](#_Toc118162485)

[2 Objectives 50](#_Toc118162486)

[2.1 Primary Objectives 50](#_Toc118162487)

[2.2 Secondary Objectives 50](#_Toc118162488)

[3 Trial Scheme 51](#_Toc118162489)

[4 Subject Enrollment 52](#_Toc118162490)

[4.1 Eligibility Criteria 52](#_Toc118162491)

[4.2 Exclusion Criteria 52](#_Toc118162492)

[4.3 Criteria for withdrawal from protocol treatment 54](#_Toc118162493)

[5 Treatment Plan 54](#_Toc118162494)

[5.1 Pretreatment Assessment 54](#_Toc118162495)

[5.2 Pretreatment Staging Criteria 55](#_Toc118162496)

[5.3 Chemotherapy, target and immunotherapy 56](#_Toc118162497)

[5.4 Radiotherapy 57](#_Toc118162498)

[5.4.1 Radiation Therapy 57](#_Toc118162499)

[5.4.2 Target Volume Determination for IMRT 57](#_Toc118162500)

[5.4.3 Prescribed Dose and Fractionation 59](#_Toc118162501)

[5.4.4 Normal Tissue Dose Constraints 59](#_Toc118162502)

[5.4.5 Radiotherapy Adjustments for Non-hematological Toxicity 60](#_Toc118162503)

[5.4.6 Radiotherapy Adjustments for Hematological Toxicity 60](#_Toc118162504)

[5.5 Salvage Therapy 60](#_Toc118162505)

[6 Dosage Adjustment Principle for chemotherapy 60](#_Toc118162506)

[6.1 General principle for dosage adjustment 60](#_Toc118162507)

[6.2 Dosage adjustment due to hematologic adverse events 61](#_Toc118162508)

[6.3 Dosage adjustment due to non-hematologic adverse events 63](#_Toc118162509)

[6.3.1 NAB-paclitaxel 63](#_Toc118162510)

[6.3.2 Cisplatin 64](#_Toc118162511)

[6.3.3 Capecitabin 65](#_Toc118162512)

[6.3.4 Apatinib 66](#_Toc118162513)

[6.3.5 Camrelizumab 68](#_Toc118162514)

[7 Concomitant Medication or Treatment 70](#_Toc118162515)

[7.1 Application of Antiemetic Drugs 70](#_Toc118162516)

[7.2 Application of Granulocyte Colony-stimulating Factor (G-CSF) 70](#_Toc118162517)

[7.3 Combined drug usage and treatment 71](#_Toc118162518)

[7.3.1 Permissible Treatment 71](#_Toc118162519)

[7.3.2 Inadmissible Treatment 71](#_Toc118162520)

[8 Observation and Assessment During Treatment 71](#_Toc118162521)

[9 Exploratory analysis and translational study 72](#_Toc118162522)

[9.1 Exploratory analysis 72](#_Toc118162523)

[9.2 Translational study 73](#_Toc118162524)

[10 Safety Evaluation 73](#_Toc118162525)

[10.1 Adverse Event Indicators 73](#_Toc118162526)

[10.2 Severe Adverse Events (SAEs) 74](#_Toc118162527)

[10.3 Record of Events 75](#_Toc118162528)

[11 Follow Up 75](#_Toc118162529)

[12 Safety Measures and Quality Control 76](#_Toc118162530)

[13 Data Collection and Data Management 76](#_Toc118162531)

[13.1 Case Report Form (CRF) 76](#_Toc118162532)

[13.2 Data Entry and Modification 77](#_Toc118162533)

[13.3 Data Locking 77](#_Toc118162534)

[14 Statistical Analysis 77](#_Toc118162535)

[14.1 Endpoint Definitions 77](#_Toc118162536)

[14.1.3 Primary End Point 77](#_Toc118162537)

[14.1.4 Secondary End Points 78](#_Toc118162538)

[14.2 Determination of the Sample Size 79](#_Toc118162539)

[14.3 Analytical Approach 80](#_Toc118162540)

[15 Ethical Considerations 80](#_Toc118162541)

[16 Administration of Experimental Drugs 81](#_Toc118162542)

[17 Progress of Study 81](#_Toc118162543)

[18 Principle center and investigator 81](#_Toc118162544)

[19 Bibliography 83](#_Toc118162545)

[Appendix I: The 8th editions of the AJCC Staging System of Nasopharyngeal Carcinoma 85](#_Toc118162546)

[Appendix II: ECOG Performance Status and Scores 86](#_Toc118162547)

[Appendix III: Acute Induction Chemotherapy and Chemoradiotherapy Toxicity Graded by Common Terminology Criteria for Adverse Events (CTCAE 5.0). 87](#_Toc118162548)

[Appendix IV: Late Onset Toxicities Graded by RTOG/EORTC System 88](#_Toc118162549)

[Summary of changes in protocol 89](#_Toc118162550)

[Original statistical analysis plan 90](#_Toc118162551)

Efficacy and Safety of Camrelizumab and Apatinib Combined with Induction Chemotherapy and Concurrent Chemoradiotherapy for Stage TanyN3M0 Nasopharyngeal Carcinoma: A Phase II QUINTUPLED Trial

# **First approved version: April 25, 2020**

Trial Code: QUINTUPLED

| Principal Investigator | Dr. Yan-Qun Xiang  Department of Nasopharyngeal Carcinoma  Cancer Center, Sun Yat-Sen University  651 Dongfeng Road East, Guangzhou, China  Tel: (020)-87343379; Fax: (020)-87343379  E-mail: xiangyq@mail.sysu.edu.cn |
| --- | --- |
| Participating Center |  |
| Sun Yat-Sen University Cancer Center, Guangzhou, China | |
| Lead investigators | Dr. Yan-Qun Xiang |
|  | Dr. Chong Zhao  Department of Nasopharyngeal Carcinoma |
|  | Dr. Changqing Xie  Thoracic and GI Malignancies Branch  National Cancer Institute, NIH |
| Data Manager & Statistician | Dr. Qing Liu  Department of Medical Statistics and Epidemiology, Cancer Center, Sun Yat-Sen University  Dr. Yan-Fang Ye  Clinical Research Design Division, Sun Yat-Sen Memorial Hospital, Sun Yat-Sen University |
| Honorary Adviser | Dr. Xiang Guo  Dr. Hai-Qiang Mai  Department of Nasopharyngeal Carcinoma  Cancer Center, Sun Yat-Sen University |
| Activation Date |  |
| First approved version: April 25, 2020 | |
| Current Edition: April 25, 2021 | |

# **Background**

Nasopharyngeal carcinoma (NPC) differs from other head and neck cancers with unique geographical, etiological, and biological features.1 It is endemic in the area of Southern China, Southeast Asia, and North Africa. More than 70% of NPC patients are classified as having locoregionally advanced disease among the 129,000 newly diagnosed cases annually.1 Induction chemotherapy followed by concurrent chemoradiotherapy is the current standard treatment for locoregionally advanced NPC, recommended by the National Comprehensive Cancer Network (NCCN) Guidelines as level 1 evidence. With the application of MRI, intensity-modulated radiotherapy and combined chemoradiotherapy has substantially improved locoregional control. However, distant metastasis predominates as the pattern of treatment failure. In particular, approximately 50% of patients with TanyN3M0 diseases eventually develop distant metastasis after undergoing abovementioned radical treatment. Therefore, more effective treatment strategies are needed for this patient population.

Due to the properties of NPC with the abundant lymphocytic infiltrations and elevated expressions of programmed death-ligand 1 (PD-L1)2, immune checkpoint blockade therapy has considerable therapeutic potential for patients with NPC. Its effect on the treatment has confirmed in recurrent or metastatic NPC (RM-NPC) in the first-, second-, and greater-line settings.3-6 However, there are no available reports assessing the value of adding immunotherapy to standard treatment in the curative setting to date.

Camrelizumab (SHR-1210) is a fully humanized immunoglobulin G4/k PD-1 monoclonal antibody, which is well tolerated with positive antitumor activity in RM-NPC. At the same time, antiangiogenic therapies have been shown to sensitize anti-PD-1/PD-L1 treatment by increasing PD-L1 expression and CD8+ T cell infiltration in preclinical models.7,8 Remarkably, apatinib, an orally administered vascular endothelial growth factor receptor 2 (VEGFR2) tyrosine kinase inhibitor, has demonstrated antitumoral activity and synergetic effects with camrelizumab in several solid tumors.9-12 Therefore, we evaluated the effect and safety of the combination of camrelizumab and apatinib with standard treatment regimen as the curative setting in stage TanyN3M0 NPC.

# **Objectives**

## **Primary Objectives**

To assess distant metastasis-free survival of camrelizumab plus apatinib combined with induction chemotherapy (TPC; NAB-paclitaxel, cisplatin and capecitabine) and concurrent chemoradiotherapy for high-risk of metastatic NPC patients (stage TanyN3M0).

## **Secondary Objectives**

To evaluateresponse rate, overall survival (OS), failure-free survival (FFS) rate, locoregional recurrence-free survival (LRFS), toxicity profile, treatment adherence of camrelizumab plus apatinib combined with induction chemotherapy (TPC; NAB-paclitaxel, cisplatin and capecitabine) and concurrent chemoradiotherapy for high-risk of metastatic NPC patients (stage TanyN3M0).

# **Trial Scheme**

Nasopharyngeal carcinoma

Histology: non-keratinizing

Staging: TanyN3M0 by AJCC 8th system*

Induction phase

3 cycles of Camrelizumab and Apatinib combined with induction chemotherapy (TPC; NAB-paclitaxel, cisplatin and capecitabine)

Concurrent chemoradiotherapy phase

Intensity-modulated radiotherapy with 2 cycles of concurrent cisplatin and Camrelizumab every 3 weeks

Maintenance phase

Camrelizumab every 3 weeks up to 1 year

Primary endpoint: Distant metastasis-free survival

Secondary endpoint: Treatment response, toxicity profile, overall survival, failure-free survival, local relapse-free survival, treatment adherence

*The 8th edition of the American Joint Commission on Cancer staging system.

# **Subject Enrollment**

## **Eligibility Criteria**

1. Patients newly diagnosed with histologically confirmed differentiated or undifferentiated non-keratinized carcinomas (according to the world health organization [WHO] histologically type).
2. Patients with tumors staged as TanyN3M0 (as defined by the 8th AJCC edition, appendix I).
3. No sign of distant metastasis.
4. Without previous anticancer treatment.
5. Without a history of other malignancies.
6. Age between 18-65 years.
7. Adequate bone marrow function: White blood cell count of ≥ 4.0×109/L, absolute neutrophil count (ANC) of ≥ 2.0×109/L, platelet count of ≥ 100×109/L, and hemoglobin concentrations of ≥ 90 g/L.
8. Sufficient renal function: creatinine clearance rate at greater than or equal to 60 mL/min.
9. Normal liver function: aspartate aminotransferase (AST) and alanine aminotransferase (ALT) ≤ 2.0 times the upper limit of normal (ULN).
10. Eastern Cooperative Oncology Group performance status of 0 or 1.
11. Signed informed consent form.

## **Exclusion Criteria**

1. Patients suffering from basaloid squamous cell carcinoma or WHO Type keratinizing squamous cell carcinoma.
2. Previous anticancer treatment, including chemotherapy, radiotherapy, and surgery (except diagnostic).
3. The presence of distant metastasis at initial diagnosis.
4. Patients who are pregnant or lactating (in women of child-bearing age, pregnancy test should be considered and effective contraception during the treatment period should be emphasized).
5. Patients suffering from any severe uncontrollable infections, serious physical or mental diseases or abnormal laboratory tests, which may incur unacceptable risk, negatively affect trial compliance, or affect the administration, distribution, metabolism, and excretion of study drugs. For example, unstable cardiac disease necessitating treatment, chronic hepatitis renal disease, poorly controlled diabetes (fasting plasma glucose greater 1.5 × the ULN), emotional disturbance, mental disorders, abnormal central nervous system, chronic diarrhea, ascites, and pleural effusion.
6. Hypertension, and cannot be well controlled by antihypertensive drugs (systolic blood pressure > 140 mmHg or diastolic blood pressure > 90 mmHg).
7. Human immunodeficiency virus (HIV) infection or known acquired immunodeficiency syndrome (AIDS), untreated active hepatitis (hepatitis B is defined as HBV-DNA ≥ 500 IU/ml; hepatitis C is defined as HCV-RNA higher than the detection limit of the analytical method) or co-infection of hepatitis B and C.
8. Patients who cannot cooperate with routine follow-up because of psychological, social, family, or geographical reasons.
9. Patients with a history of other malignancies before admission.
10. Patients with a history of psychotropic substance abuse or drug use.
11. Receive experimental treatment from other clinical studies at the same time (during the treatment period of this trial).
12. Refuse to sign the informed consent form.
13. Long-term use of immunosuppressive agents after organ transplantation.

## **Criteria for withdrawal from protocol treatment**

The reasons for subjects’ withdraw from the study may include:

1. Evidence of disease recurrence.
2. The patient may withdraw from the study and reject further follow-up at any time for any reason. The reason should be recorded.
3. Unacceptable toxicity, the reasons for which must be recorded.
4. The test results of the subject's β-HCG test indicated that the subject was pregnant. At the same time, pregnancy will also be reported as a serious adverse event reporting procedure.
5. Use of prohibited medications or other medications that the investigator believes will cause a toxic reaction or affect the results of the study.
6. Patients suffering from an intercurrent disease that significantly affects the assessment of clinical status or necessitates discontinuation of the drug, or both.
7. Investigators believe that the termination of treatment is beneficial to patients according to their physical condition.
8. Death.

# **Treatment Plan**

## **Pretreatment Assessment**

All patients are under standardized management for NPC, and they need to perform a series of examinations as well as provide relevant information to confirm pathologic diagnosis and clinical stage before admitted into trial:

1. Signed informed consent.
2. Medical history review.
3. Personal data collection.
4. Current medications and treatment.
5. Body examinations, include height, weight and vital signs.
6. Physical examination of head and neck region, include nasopharynx and cervical lymph nodes.
7. Physical examination of the nervous system.
8. Nasal endoscopy and lesion biopsy.
9. Complete blood count and differential, electrolytes and liver function test.
10. Urinalysis.
11. EBV antibodies and EBV DNA testing.
12. Virological examination (completed within 14 days prior to the first dose): HBsAg (if positive, HBV-DNA is required), HBsAb, HBeAg, HBeAb, HBcAb, HCV-Ab (if positive, HCV-RNA is required) , HIV-Ab.
13. Thyroid function.
14. Coagulation function.
15. Electrocardiogram and Echocardiography.
16. Imaging, including enhanced MRI or enhanced CT of the head and neck (CT is indicated only in patients with contraindication to MRI).
17. Chest CT.
18. ECT bone scan.
19. Abdominal CT/MR.
20. PET/CT is optional and is performed at the discretion of the attending physician.
21. Pregnancy test (applicable to women of childbearing age).

## **Pretreatment Staging Criteria**

The disease stage of subjects will be staged according to the 8th edition of the Union for International Cancer Control / American Joint Committee on Cancer (UICC/AJCC) staging system (Appendix I).

## **Chemotherapy, target and immunotherapy**

5.3.1 Induction therapy phase

1. Camrelizumab

Camrelizumab was intravenously given at dose of 200 mg, administered as a 30-minutes (no less than 20 minutes, no more than 60 minutes) infusion on day 1. Camrelizumab will be administrated throughout the trial every three weeks up to one year.

2. Induction chemotherapy with TPC regimen

The TPC regimen consisted of NAB-paclitaxel at a dose of 200 mg per square meter, administered over 30 minutes infusion on day 1, followed by cisplatin at a dose of 60 mg per square meter on day 1; No premedication against allergic reaction was given before the NAB-paclitaxel; And capecitabine at a dose of 1000 mg per square meter, taken orally twice a day on days 1 to 14; repeat every 21 days for 3 cycles.

After the infusion of camrelizumab, NAB-paclitaxel and cisplatin are successively administered intravenously after an interval of at least 30 min.

3. Apatinib

Apatinib taken orally at a dose of 250 mg daily for a total of 8 weeks. The drug should be administered on the first day of initial treatment and discontinued one week before radiotherapy.

5.3.2 Concurrent chemotherapy with cisplatin

Concurrent chemotherapy with cisplatin

The concurrent chemotherapy consisted of cisplatin at a dose of 100 mg per square meter, administered as a 4-hour infusion; repeat every 21 days for 2 cycles.

Cisplatin administration follows local hydration protocols to prevent/minimize nephrotoxicity. Pre-hydration (at least 12 hours before cisplatin administration, D0) and post-hydration (D1-3) with over 2000 ml of normal saline infused each time are both needed. The use of mannitol (D1) and furosemide (D1) is essential for it helps to reduce cisplatin-related nephrotoxicity by diuresis. Twenty-four hours urinary output should be recorded (D0-D3) and urinalysis will be performed (D2-D3). Electrolytes and serum creatinine are monitored during treatment and a follow-up creatinine within 24-48 hours of the cisplatin dose is recommended. One hour before concurrent chemotherapy, patients are given 5-hydroxytryptamine-3 receptor antagonists for anti-nausea (D1). The NK-1 receptor antagonist aprepitant QD were recommended in D1-D3.

## **Radiotherapy**

### **Radiation Therapy**

Radiation therapy with intensity-modulated radiotherapy (IMRT) techniques is mandatory. Target volumes are defined following the International Commission on Radiation Units and Measurements (ICRU) reports 50 and 62. The principle of target volume determination for IMRT and prescribed dose and fractionation areas are described as follows.

### **Target Volume Determination for IMRT**

Gross tumor volume (GTV)

1. Gross tumor target volume of primary nasopharyngeal focus (GTVnx): primary nasopharyngeal tumors and their invasive areas revealed by clinical examination and imaging examination.
2. Clinically involved gross cervical lymph nodes (GTVnd): cervical metastatic lymph nodes clinically affected and/or imaged (imaging diagnostic criteria: a. short diameter >1 cm; b. necrotic focus in the center; c. extracapsular invasion; d. clustered or clustered short diameter >0.8 cm).

Clinical target volume (CTV)

1. Nasopharyngeal clinical target volume I (CTV1, nasopharyngeal high-risk area): GTVnx expands 0.5-1.0 cm forward, upper, lower, and bilateral, and 0.2-0.3 cm backward (according to the characteristics of adjacent tissue structure), which should also include all nasopharyngeal mucosa and 0.5 cm below.
2. Clinical target volume II (CTV2, nasopharyngeal low-risk area, cervical metastatic lymph node area, and cervical area requiring preventive irradiation): CTV1 expands 0.5-1.0 cm forward, upper, lower, and bilateral, 0.2-0.3 cm backward (according to adjacent tissue structure characteristics) including the lymphatic drainage area of GTVnd and extends to negative lymph node drainage area requiring preventive irradiation (Table 1).

| **Table 1.** Cervical preventive exposure areas | |
| --- | --- |
| Lymph node metastasis | Cervical lymph node area (CTV2 neck) requiring radiation prevention |
| II | Ipsilateral II, III, IV, Va, Vb |
| III | Ipsilateral II, III, IV, Va, Vb |
| Va | Ipsilateral II, III, IV, Va, Vb |
| IV | Ipsilateral II, III, IV, Va, Vb, supraclavicular region |
| Vb | Ipsilateral II, III, IV, Va, Vb, supraclavicular region |
| Unilateral neck | Contralateral zones II, III, Va |

Note: Indications of area are included in CTV2: (1) metastatic lymph nodes in area IIa (> 3 cm); (2) extracapsular invasion of metastatic lymph nodes in area IIa; (3) the metastatic lymph nodes in area IIa push the submandibular gland or have no clear demarcation with the submandibular gland; (4) lymph node metastasis in multiple areas of the ipsilateral whole neck (>4 areas).

Planned target volume (PTV)

PTVnx, PTVnd, PTV1, and PTV2 are GTVnx, GTVnd, CTV1, and CTV2, respectively, with expansion to a certain distance, generally 0.3 cm in the forward, upper, lower, left and right directions, and 0.1-0.2 cm in the backward direction.

### **Prescribed Dose and Fractionation**

All patients will be treated with IMRT using simultaneously integrated boost, 5 fractions per week. The prescribed dose is PTVnx: 68-72 Gy/30-33F, PTVnd: 64-68 Gy/30-33F, PTV1: 60-64 Gy/30-33F, PTV2: 54-58 Gy/30-33F, for the PTVs derived from GTVnx, GTVnd, CTV1, and CTV2, respectively.

### **Normal Tissue Dose Constraints**

| **Table 2.** Normal tissue dose constraint structure. | |
| --- | --- |
| **Structure** | **Dose constraints** |
| **Critical organ at risk** |  |
| Brain stem | Dmax ≤ 54 Gy |
| PRV-Brain stem | D1 ≤ 60 Gy |
| Spinal cord Dmax* | Dmax* ≤ 45 Gy |
| PRV-Spinal cord | D1†≤ 50 Gy |
| Optic nerve | Dmax ≤ 54 Gy |
| PRV-Optic nerve | D1 ≤ 60 Gy |
| Optic chiasm | Dmax ≤ 54 Gy |
| PRV-Optic chiasm | D1 ≤ 60 Gy |
| Temporal lobe | Dmax ≤ 60 Gy |
| PRV-Temporal lobe | D1 ≤ 65 Gy |
| **Intermediate-risk organ at risk** |  |
| Pituitary | Dmax < 60 Gy |
| Mandibular | Dmax < 70 Gy |
| Temporomandibular Joint | Dmax < 70 Gy |
| Lens | Dmean‡ < 8 Gy |
| Eyes | Dmean < 35 Gy |
| **Low-risk organ at risk** |  |
| Parotid | Dmean < 26 Gy |
| Parotid | V30¶ < 50% |
| Cochlea | Dmean < 50 Gy |
| Tongue | Dmean < 45 Gy |
| Larynx | Dmean < 45 Gy |
| PRV = planning organ at risk volume.  * Maximum point dose to the target volume.  † Dose received by 1% of the target volume.  ‡ Mean dose to the target volume.  ¶ At least 50% of the gland will receive <30 Gy (should be achieved in at least one gland) | |

### **Radiotherapy Adjustments for Non-hematological Toxicity**

Side effects of radiotherapy may include anorexia, mucositis and skin reaction. The investigator will manage these conditions according to clinical practice. No radiotherapy dose modifications are allowed. Treatment interruptions are allowed if symptomatic mucositis or skin reactions occur that, in the judgment of the attending clinician, warrants a break. The treatment is completed according to protocol for treatment breaks up to and including 14 days. If the break exceeded 14 days, the patient is removed from protocol treatment, completing treatment at the discretion of his or her physician but followed up and included in the analysis.

### **Radiotherapy Adjustments for Hematological Toxicity**

Radiotherapy will be withheld until ANC > 0.5×109/L and platelet > 25×109/L.

## **Salvage Therapy**

Nasopharyngeal surgery, neck dissections, secondary radiotherapy, chemotherapy, or immunotherapy may be given to patients with relapse or metastasis after treatment according to guidelines of National Comprehensive Cancer Network (NCCN).

# **Dosage Adjustment Principle for chemotherapy**

## **General principle for dosage adjustment**

1. Assessment and grading for toxicity in patients will be carried out using the the Common Terminology Criteria for Adverse Events, version 5.0, of the National Cancer Institute (NCI CTCAE V5.0).
2. There will be no dose escalation of NAB-paclitaxel, cisplatin and capecitabine (TPC) regimen.
3. Chemotherapy dosage modifications based on nadir counts and interim nonhematological toxicities from the preceding cycle.
4. Dosage may not be reduced or discontinued if the investigator considers that the adverse reaction is unlikely to develop into a serious or life-threatening events and will not result in delay or interruption of treatment. There is no need to reduce the dosage or discontinue treatment if anemia can be well alleviated by blood transfusion.
5. A delay of up to 3 weeks for a cycle will be permitted to allow for the severity of toxic events of grade 3/4 to be reduced to grade 1 or less (except for alopecia, fatigue, malaise, and nail changes). Delays in excess of 3 weeks will necessitate require discontinuation of chemotherapy unless continued therapy is deemed necessary by the investigator.
6. Chemotherapy must be withheld until the neutrophil count is > 1.5×109/L and the platelet count is > 100×109/L.
7. Missing capecitabine doses due to toxicity should be no longer replenished or resumed, and the patient continued the scheduled course of treatment instead.
8. If creatinine clearance was less than 70 ml/min but greater than 50 ml/min at any time during the previous chemotherapy course. The dose of cisplatin should be reduced by 50% during the next cycle of chemotherapy. If the creatinine clearance rate was less than 50 ml/min during the previous chemotherapy course, subjects should discontinue study therapy.

## **Dosage adjustment due to hematologic adverse events**

The hematological toxicity is assessed according to the NCI CTC AE V5.0 classification standard, and the dosage adjustment of NAB-paclitaxel and cisplatin is performed according to the following principles.

| Dosage adjustment of NAB-paclitaxel and cisplatin for hematologic toxicitya | | | | |
| --- | --- | --- | --- | --- |
| Toxicity | Grade | Time | NAB-paclitaxel | Cisplatin |
| Anemia | Any | Any | Full dosage | Full dosage |
| Neutropeniab | Grade 3 | Any | Full dosage | Full dosage |
| Grade 4 | First time | 160 mg/m2 | 50 mg/m2 |
| Second time | 120 mg/m2 | 40 mg/m2 |
| Third time | Stop | Stop |
| Neutropenic feverc | Grade 3-4 | First time | 160 mg/m2 | 50 mg/m2 |
| Second time | 120 mg/m2 | 40 mg/m2 |
| Third time | Stop | Stop |
| Thrombocytopenia | Grade 4 | First time | 160 mg/m2 | 50 mg/m2 |
| Second time | 120 mg/m2 | 40 mg/m2 |
| Third time | Stop | Stop |
| Note:   1. Grade 3 neutropenia or thrombocytopenia, which does not result in prolonged chemotherapy interval, does not require dosage reduction. If this leads to prolonged chemotherapy interval, G-CSF or platelet-enhancing drug support may be considered for the next course of treatment. If this is still not resolved, the dosage should be reduced with the reference to the corresponding grade 4. 2. Grade 3 or 4 neutropenia may be consideration for prevention with G-CSF support during the next course of treatment. 3. Grade 3 or 4 neutropenic fever may be prevented with G-CSF support while the dosage is reduced during the next cycle of treatment. The definition of neutropenic fever: ANC < 1.0×109/L with fever ≥ 38.5 ℃ for grade 3 and ANC < 1.0×109/L with fever ≥ 38.5 ℃ with life-threatening sepsis for grade 4. | | | | |

## **Dosage adjustment due to non-hematologic adverse events**

### NAB-paclitaxel

Peripheral neuritis and extremities joint myalgia

If a patient develops one of the above symptoms, the following methods are recommended to adjust the dosage of NAB-paclitaxel according to the duration and severity of the symptoms. Symptomatic treatment with non-steroidal anti-inflammatory drugs can be given alleviate extremities joint myalgia.

| Dose adjustment of NAB-paclitaxel for non-hematologic toxicity | | | | |
| --- | --- | --- | --- | --- |
| Adverse events | Grade | Duration of adverse events | | |
| 1-7 days | Over 7 days | Persistent during treatment |
| Pain/paresthesia/sensory disturbances, but does not affect function | 1 | Full dose | Full dose | 160 mg/m2 |
| Pain/paresthesia/sensory disturbances that affect function but do not affect daily activities | 2 | Full dose | Full dose | 120 mg/m2 |
| Pain/paresthesia/sensory disturbances, with functional impairment, and interference with daily activities | 3 | Full dose | 120 mg/m2 | Stop |
| Pain/paresthesia/sensory disturbances resulting in loss of function or life threating | 4 | Stop | Stop | Stop |

Abnormal bilirubin and impaired liver function

For HBs-Ag positive or serum HBV DNA positive patients, prophylactic anti-HBV drugs should be used before treatment. If the liver function damage after chemotherapy is caused by the activation of hepatitis B virus, anti-hepatitis B virus drug therapy should be strengthened, and positive symptomatic treatment should be carried out. If grade 2 liver toxicity occurs, there is no need for adjusting NAB-paclitaxel dosage, but if grade 3 liver toxicity occurs, NAB-paclitaxel dosage should be reduced by 20%. Whenever grade 4 liver toxicity occurs, NAB-paclitaxel should be permanently discontinued. If grade 2-4 toxicity occurs, medication will be suspended until the toxicity returns to grade 1 or below before restarting treatment.

Other toxicity

If other grade 3 or less toxic reactions occur, symptomatic treatment should be given as far as possible, with no reduction of NAB-paclitaxel for the next course of treatment. If grade 3 toxicity occurs, when the toxicity reverts from grade 3 to grad 1 or below, the dosage of NAB-paclitaxel for the next course of treatment is reduced by 20%. If grade 4 toxicity occurs, treatment with NAB-paclitaxel should be permanently discontinued. However, in the event of certain grade 3 or higher adverse events (i.e., fatigue, changes in sexual function, and dry skin without clinical significance), the investigator may continue the treatment at her or his discretion.

### Cisplatin

Other non-hematological toxicity

If other toxicity reaction less than grade 3 occur, symptomatic treatment should be given whenever possible. If grade 3 or 4 toxicity occurs, treatment should be suspended, and when toxicity reverts to grade 1 or below, cisplatin should be administered at 80% of the initial dosage for the next course of treatment.

### Capecitabin

Once the dosage of capecitabin has been reduced, it should not be increased later. Dosage adjustment is not recommended when grade 1 adverse events occur. Capecitabin treatment should be suspended if grade 2 or 3 adverse events occur. Treatment can be restarted with the original dosage of capecitabin or at the dosage adjusted in the following principles once the adverse reaction has disappeared or the severity has reduced to grade 1. If grade 4 adverse reactions occur, treatment should be suspended until the adverse reactions disappear or the severity is reduced to grade 1, and then treatment should be restarted at 50% of the original dosage. Missing capecitabine doses due to toxicity should be no longer replenished or resumed, and the patient continued the scheduled course of treatment instead.

The detailed dose adjustment of capecitabine is performed according to the following principles.

| **Table 3:** Dose adjustment of capecitabine. | | |
| --- | --- | --- |
| **NCI assessed advent events** | **During treatment** | **Dose of the next cycle (% original dose)** |
| **Grade 1** | Full dose | Full dose |
| **Grade 2** | | |
| First time | Suspended until returned to grade 0~1 | 100% |
| Second time | Suspended until returned to grade 0~1 | 75% |
| Third time | Suspended until returned to grade 0~1 | 50% |
| Fourth time | Permanent termination |  |
| **Grade 3** | | |
| First time | Suspended until returned to grade 0~1 | 75% |
| Second time | Suspended until returned to grade 0~1 | 50% |
| Third time | Permanent termination |  |
| **Grade 4** | | |
| First time | Permanent termination or suspended until returned to grade 0~1 if researcher believe it is in the patient's interest to continue treatment | 50% |
| Note: patients with hand-foot syndrome would be recommended treated with topical emollient, topical corticosteroid cream, or creams containing urea. | | |

### Apatinib

Adverse reactions should be closely monitored during treatment and the dose should be adjusted as needed to enable patients to tolerate the treatment. Once the dose of the drug has been reduced, it should not be increased later. Apatinib 250 mg is recommend orally administrated daily, 7 days every week. In case of adverse reactions related to apatinib, dose frequency should be adjusted according to the following conditions: The recommended frequency should be reduced to:

- 250 mg daily, 5 days every week for the first adjustment;
- 250 mg every two days for the second adjustment;
- Suspended if the relative adverse events occurred third time; After the drug reaction disappeared, the dose before the adjustment could be restored.
- If the patient is still intolerant, stop apatinib permanently.

Hypertension

For patients with hypertension, antihypertensive drugs should be used reasonably before the initiation of apatinib administrated, and blood pressure should be closely monitored during treatment. For patients with grade 1 or 2 hypertension (120-159 mmHg systolic pressure or 80-99 mmHg diastolic pressure) during treatment, there is no need to adjust the dose of apatinib; For grade 3 hypertension (systolic pressure ≥ 160mmHg or diastolic pressure ≥ 100mmHg), apatinib should be stopped. After drug management intervention, apatinib can be continued with reduced dosage if blood pressure is well controlled. Patients with grade 4 hypertension, such as hypertensive crisis and other malignant hypertensive reactions, need to stop taking apatinib immediately and permanently.

Proteinuria

Urine protein should be monitored closely during treatment. Urine routines and/or 24-hour proteinuria are recommended every 2 weeks for the first 2 months and every 4 weeks thereafter. There is no need to adjust the dose of apatinib for grade 1 or 2 urine protein during the treatment. Apatinib should be stopped for grade 3 (24-hour urine protein quantification ≥ 3.5 g), and drug intervention should be performed. After proteinuria is restored to grade 2 or below, apatinib can be continued with reduced dosage. If grade 3 proteinuria occurs again after twice reduction, apatinib should be stopped permanently.

Hand and foot skin reaction

It is recommended that the hands and feet skin reaction drug prevention intervention can be applied with urea ointment, moisturizing cream or aloe gel on the skin of hands and feet from the first day of taking apatinib. For grade 1 reaction, local symptomatic support is recommended without dose adjustment; For grade 2 reaction, dose can be adjusted appropriately; For grade 3 reaction, apatinib should be suspended; After symptomatic support, apatinib can be continued with reduced dosage; if the reaction persist or aggravate, apatinib should be discontinued.

Bleeding or thrombosis

For grade 2 venous thrombosis, symptomatic treatment and close monitoring was recommended without dose adjustment; For grade 3 or asymptomatic grade 4 reaction, apatinib should be stopped and treated with anticoagulation for at least one week. When the symptoms of thrombosis improve and grade 3-4 bleeding does not occur, apatinib can be continued with adjusted dose, otherwise the drug should be stopped.

Gastrointestinal reaction

For patients with grade 1 reaction, local symptomatic support is recommended without dose adjustment. For grade 2 reaction, especially diarrhea, vomiting and other symptoms, apatinib should be suspended if symptoms did not relieve after symptomatic treatment; For grade 3-4 reaction, apatinib should be discontinued immediately.

Impaired liver function

For HBs-Ag positive and/or serum HBV DNA positive patients, prophylactic anti-HBV drugs should be used before treatment. If the liver function damage after treatment is caused by the activation of hepatitis B virus, anti-hepatitis B virus drug therapy should be strengthened, and positive symptomatic treatment should be carried out. If grade 1 or 2 liver toxicity occurs, there is no need for adjusting dosage, but if grade 3 or 4 liver toxicity occurs, apatinib dosage should be suspended, and the dosage should be performed with first dosage reduction after toxicity decreasing to grade 1.

### Camrelizumab

The adverse events related to camrelizumab may be immunologically related and may occur shortly after the first dose or several months after the last dose. If the situation listed the following table occurs, the administration of camrelizumab should be suspended. If the investigator considers the benefit/risk ratio of the subject during the clinical operation and believes that the operation listed the following table cannot be performed or encounters situations not listed in the following Table, the investigator must suspend or resume the administration of camrelizumab.

The dose adjustment of camrelizumab is performed according to the following principles.

| **Table 4**: Dose adjustment of camrelizumab | | |
| --- | --- | --- |
| **Adverse events** | **Grade** | **Treatment adjustment** |
| Reactive capillary endothelial proliferation | Grade 3 | Suspend drug |
| Grade 4 | Permanent withdrawal |
| **Immune-related adverse events** | | |
| Pneumonia | Grade 2 | Suspend drug until recover to Grade 0-1 |
| Grade 3-4 or Recurrent Grade 2 | Permanent withdrawal |
| Diarrhea and colitis | Grade 2-3 | Suspend drug until recover to Grade 0-1 |
| Grade 4 | Permanent withdrawal |
| Hepatitis | Grade 2 | Suspend drug until recover to Grade 0-1 |
| Grade 3-4 | Permanent withdrawal |
| Nephritis | Grade 2-3 elevated creatinine | Suspend drug until recover to Grade 0-1 |
| Grade 4 elevated creatinine | Permanent withdrawal |
| Endocrine disease | Grade 2-3 | Suspend drug until recover to Grade 0-1 |
| Grade 4 | Permanent withdrawal |
| Cutaneous AEs | Grade 3 | Suspend drug until recover to Grade 0-1 |
| Grade 4 | Permanent withdrawal |
| Thrombopenia | Grade 3 | Suspend drug until recover to Grade 0-1 |
| Grade 4 | Permanent withdrawal |
| Other irAEs | Grade 3-4 elevated blood amylase or lipase  Grade 2-3 pancreatitis  Grade 2 myocarditis  Grade 2-3 other irAEs for the first time | Suspend drug until recover to Grade 0-1 |
| Grade 4 pancreatitis or recurrent pancreatitis  Grade 3-4 myocarditis  Grade 3-4 encephalitis  Grade 4 other irAEs for the first time | Permanent withdrawal |
| Recurrent or persistent AEs | Recurrent Grade 3-4  Grade 2 or 3 AEs did not recurrent to grade 0-1 within 12 weeks of the last treatment | Permanent withdrawal |
| infusion reaction | Grade 2 | Slow down the drip rate or suspend the drug |
| Grade 3-4 | Permanent withdrawal |
| Note:  a. For subjects experiencing intolerable or persistent grade 2 drug-related adverse events, the investigator may suspend camrelizumab as appropriate; if the persistent grade 2 adverse reaction fails to recover to grade 1 or below within 12 weeks after the last dose, the medication should be terminated.  b. In the event of any recurrent grade 3 drug-related AE or any life-threatening event, the medication should be terminated. | | |

# **Concomitant Medication or Treatment**

## **Application of Antiemetic Drugs**

1. Preventive antiemetic therapy: 5-HT3 antagonist given 1 hour before chemotherapy.
2. Delayed vomiting: metoclopramide 20 mg BID and the NK-1 receptor antagonist aprepitant (125 mg, 80 mg, and 80 mg for day 1-3, respectively) were recommended. The 5-HT3 antagonist can replace metoclopramide.

## **Application of Granulocyte Colony-stimulating Factor (G-CSF)**

The use of G-CSF is not advocated for primary prevention; when white blood cell count (WBC) and/or ANC are significantly reduced, G-CSF treatment can be given according to the judgments of clinicians; if grade 3 or 4 neutropenia or fever (oral temperature > 38.3°C or > 37.8°C lasting for more than one hour) is noted, the following regimens are excepted for dose adjustment. Secondary prevention can also be given; the use of G-CSF should be more than 24 hours away from the end of chemotherapy drugs. Polyethylene glycol-conjugated recombinant human granulocyte stimulating factor is an alternative agent for the prevention of serious neutropenia.

## **Combined drug usage and treatment**

### **7.3.1 Permissible Treatment**

Supportive treatment, including pain treatment, blood transfusion, intravenous nutrition, etc.

### **7.3.2 Inadmissible Treatment**

During the study period, patients could not accept other experimental drugs and any other form of radiotherapy and chemotherapy, but the follow-up anticancer treatment for patients who fails to follow the treatment plan is not limited.

# **Observation and Assessment During Treatment**

The following items need to be assessed during the treatment period:

1. Nasopharynx and neck MRI and nasopharyngeal endoscopy will be performed before and after induce chemotherapy and at the end of radiotherapy, and complete response (CR), partial response (PR), stable disease (SD) or progressive disease (PD) will be evaluated with the Response Evaluation Criteria in Solid Tumors (RECIST) version 1.1. Chest CT and abdominal CT/MR will be reexamined after treatment.
2. General conditions.
3. Acute and late toxicity assessment, including hematological toxicity, gastrointestinal reactions, hepatotoxicity, nephrotoxicity, mucositis, neurotoxicity, ototoxicity, etc.
4. Immune-related toxicity assessment.
5. Laboratory tests: Routine blood tests and blood biochemistry are required on day 0, day 8, and day 15 of chemotherapy for each cycle; the following tests are routinely suggested but not mandated before each cycle of immunotherapy: thyroid function (TSH, FT3, FT4), coagulation function (APTT, PT, FIB, INR, D-D), serum amylase, lipase, myocardial enzyme profile, hypersensitivity troponin, brain natriuretic peptide, inflammatory cytokine profile, etc.
6. Indirect nasopharyngoscopy will be performed to examine the tumor in the nasopharynx every week, and the regression of enlarged lymph nodes should be observed and measured. Nasal endoscopy will be performed before and after the treatment course and is also required after each cycle of chemotherapy or immunotherapy.

# **Exploratory analysis and translational study**

## Exploratory analysis

Pathologic evaluation of endoscopic biopsy and/or lymph nodes biopsy after induction phase would be conducted. The primary efficacy endpoint was DMFS, which was defined as the interval between the initial treatment and distant failure.

EBV DNA clearance rate.

## Translational study

1. Signed informed consent is required prior to each biological sample collection.
2. Tissue specimens from nasopharyngeal and/or neck mass biopsies or fine needle aspiration prior to treatment and after induction therapy, or from recurrence or metastasis site if recurrent or metastasis event occurred.
3. Blood samples, collected at the following time points: before treatment, after induction therapy, the end of radiotherapy, the end of maintain phase, and the time point of distant metastasis or recurrence events.
4. Clinical specimens for the above cases whose informed consent have been signed will be collected by designated professionals, and all specimens collected will be used for subject-related scientific research only.
5. After collection, tumor tissue specimens will be collected by the principal investigator and stored in a refrigerator at -80 °C or transferred to a designated laboratory for processing and analysis.
6. Hematology specimens are collected, centrifuged, and stored by the principal investigator, or transferred to the designated laboratory for biological sample processing and analysis.

# **Safety Evaluation**

## **Adverse Event Indicators**

Toxicity evaluation should be performed weekly during the treatment and four weeks after the end of treatment. All observations relevant to the safety of the drug under study will be documented in the case report form (CRF) and the final summary report. Safety indicators are as follows: adverse events, laboratory changes (hematology, blood biochemistry), changes in vital signs (blood pressure, heart rate, respiratory rate, body temperature), and changes in electrocardiogram and chest CT.

## **Severe Adverse Events (SAEs)**

A SAE is any life-threatening medical adverse event that occurs at a variety of drug doses:

1. Causing death or endangering life. It should be noted that the term "life-threatening" in the definition of "severe" means that at the time of the event, the patient is at risk of death. It's not a hypothetical event.
2. Causing permanent or severe disability/dysfunction.
3. Teratogenicity/birth defects.
4. Resulting in prolonged hospital stays.
5. Lead to secondary tumors.
6. Other unpredictable drug related AEs

In the event of a serious adverse event, regardless of whether it is related to the study drug, the investigator should immediately notify the Clinical Research Center (GCP) of the table of serious adverse events within 1 business day (in any case). The form must be dated and signed by the person who filled it

All adverse events, whether or not considered drug related, should be documented on the case report, including diagnosis, start/end time, intervention taken, discontinuation of treatment, salvage measure, outcome, and other possible causes. The investigators should determine the relationship of all adverse events to treatment and the severity of the events. The severity of acute adverse events should be graded according to CTC AE (version 5.0). The most severe severity should be recorded in the CRF.

## **Record of Events**

All adverse events, whether or not considered drug related, should be documented on the case report, including diagnosis, start/end time, intervention taken, discontinuation of treatment, salvage measure, outcome, and other possible causes. The investigators should determine the relationship of all adverse events to treatment and the severity of the events. The severity of acute adverse events should be graded according to CTC AE (version 5.0). The most severe severity should be recorded in the CRF.

# **Follow Up**

After completion of radiotherapy, patients are followed up every 3 months during the first 3 years and every 6 months thereafter until death. The nasopharynx will be assessed by endoscopy approximately 4 weeks after completion of radiotherapy. Further investigations with MRI or CT will be arranged 3 months after completion of radiotherapy. Other follow-up items include physical examination, blood examination, chest CT or X-ray, abdominal sonography or CT, etc. Treatment responses are also evaluated according to the RECIST, version 1.1. If residual disease is found, whether to treat and which treatment modalities to be employed will be decided by individual clinician. For statistical purpose, any residual disease found 12 weeks after completion of RT will be considered as local failure. Similarly, any residual nodal disease within 12 weeks after RT is considered as regional failure.

Clinical diagnosis is accepted for sites not easily accessible if classical changes are shown on imaging. The dates of diagnosis of local, nodal, and distant failure will be recorded. The earliest date of detecting symptomatic late onset toxicities and the eventual maximum grade by the Late Radiation Morbidity Scoring Criteria of the Radiation Therapy Oncology Group (RTOG) and European Organization for Research and Treatment of Cancer (EORTC) should be recorded. All patients will be followed-up until death and cause of death recorded. Deaths due to unknown cause are counted as death due to NPC if disease is still present at last assessment.

# **Safety Measures and Quality Control**

1. Researchers is responsible for obtaining informed consent signed by each subject or his or her agent; carefully fill out the case report form; complete records of laboratory examinations, clinical records, and original medical records of the subjects.
2. Make monitoring plan of adverse effects and emergency plan.
3. Research plan is made by all investigators and approved by Ethics Committee.
4. Develop all kinds of standard operation procedures related to this study.
5. Establish standardized evaluation system to unify diagnostic criteria, curative effect judging criteria, etc.
6. Establish professional statistical plan.
7. Research staffs are trained before the study.
8. Arrange quality controller, make quality control plan and check regularly.
9. Set up coordination committee, curative effect judging group and follow-up team.

# **Data Collection and Data Management**

## **Case Report Form (CRF)**

The CRF is completed by the investigator and must be completed by each enrolled patient. After the completed CRF is reviewed by the clinical supervisor, the first copy is transferred to the data administrator for data entry and management.

## **Data Entry and Modification**

All information about the enrolled patients after registration will be sent to Sun Yat-Sen University Cancer Center for management. We have stewards taking charge of data entry and management. Data administrators use EpiData 3.1 software to compile data entry program and carry out data entry and management. In order to ensure the accuracy of the data, two data administrators should independently conduct double input and proofreading. If there are any questions in the CRF, the data administrator will send questioned data to the investigator for verification. The investigator should answer and return the questions as soon as possible. The data administrator can modify, confirm and enter the data according to the answers of the investigator.

## **Data Locking**

After confirming that the established database is accurate, the main researchers, data administrators, and statisticians will lock the data. The locked data file will not be modified.

# **Statistical Analysis**

## **Endpoint Definitions**

### **Primary End Point**

The primary endpoint was DMFS, which was defined as the time from the initiation of treatment to documented distant metastasis.

### **Secondary End Points**

Response rate. Approximately one week after completing induction therapy, the responses to induction therapy are assessed by imaging by independent image committee. The nasopharynx and cervical nodes should be assessed by endoscopy and MRI or CT at approximately 12 weeks after completion of radiotherapy. Other examinations included chest CT, abdominal CT/MR, and bone scans. Tumor response is classified according to the RECIST criteria, version 1.1. Complete response is defined as the disappearance of all target lesions. Any pathological lymph nodes (whether target or nontarget) must have been reduced in the short axis to <10 mm. Partial response is defined as an at least 30% decrease in the sum of diameters of the target lesions, with the baseline diameter sum serving as the reference. Progressive disease is defined as an at least 20% increase in the sum of diameters of the target lesions, with the smallest sum during study serving as the reference (including the baseline sum). In addition to a relative increase of 20%, the sum must also demonstrate an absolute increase of at least 5 mm. Stable disease is defined as both insufficient size reduction to qualify as partial response and an insufficient increase to be considered progressive disease, with the smallest diameter sum during the study serving as the reference.

PFS, which is defined as the time from the initiation of induction therapy to documented distant metastasis, locoregional recurrence, or death from any cause, whichever occurred first

OS, which is defined as the time from the initiation of induction therapy to any-cause death.

LRFS, which is defined as the time from the initiation of induction therapy to documented locoregional recurrence.

Treatment toxicity. The incidence of serious toxicity (treatment-related adverse events and immune-related adverse events) during induction phase, radiotherapy phase, and maintain phase, late adverse events, compliance to treatment were included. Adverse events refer to any adverse medical events that occur on the patient. They do not necessarily have a causal relationship with treatment. Investigators should keep a detailed record of any adverse events that occur in the patients. The record of adverse events shall include a description of the adverse events, the time of occurrence, severity, duration, measures taken, and the final outcomes. Investigators should assess the possible association between the adverse events and the tested drugs according to the five-level classification of "positive relevance, possible irrelevance, positive irrelevance, and inability to determine." Treatment-related adverse events are assessed according to NCI-CTCAE version 5.0. Acute toxicities include hematological toxicity, mucositis, allergic reactions and other adverse events and serious adverse events. The severity of immune-related adverse events was graded according to the NCI-CTCAE version 5.0. The severity of late adverse events was graded according to the Radiation Therapy Oncology Group and European Organization for Research and Treatment of Cancer late radiation morbidity scoring scheme.

Quality of life. EORTC QLQ-C30 and QLQ-H&N35 (v1.0) are used to assess life quality of patients, and the change of their life quality is recorded and evaluated weekly from before the beginning of treatment to the last dose of the camrelizumab.

## **Determination of the Sample Size**

Considering over half distant metastasis events occurred within one year after radical treatment, the primary endpoint of this study was the DMFS at the time point of 1 year. The following set of hypotheses were considered:

H0: The maximum 1-year DMFS rate of treatment cohort is not more than 76%;

HA: The minimum 1-year DMFS rate of treatment cohort is not less than 90%.

The historical data estimation is based on the prognostic data of N3 population reported from our center.13 According to the Fleming single-stage design, the maximum effective rate (P0) was 76%, the minimum effective rate (P1) was 90%, unilateral α was set as 0.05, and the power was set at least 80%, 46 patients should be enrolled. Assuming an 8% dropout rate, we estimated that the study would need to include a total of 50 patients. If 7 of the first 46 evaluable patients failed, the DMFS rate would be considered unacceptable, and the regimen would be declared promising if at least 40 successes of the first 46 evaluable patients were observed.

## **Analytical Approach**

The therapeutic effects will be analyzed by both full analysis set (intention-to-treat) and per-protocol set. Patients who completed radical radiotherapy and at least one dose of induction therapy were included in the per-protocol analysis set. Safety analysis will be performed in safety population, which is made up of eligible cases that received at least one dose of protocol-defined treatment.

The study results will be reported after universal 1-year follow-up (for the primary endpoint analysis), 2-year and/or 3-year follow-up, and 5-year follow-up (for the long-term results).

# **Ethical Considerations**

This study must be approved by an appropriate institutional ethic committee.

An informed consent must be obtained from individual patients. Copy of the Consent Form, contact number of investigator and ethics committee will be available to patient on request.

All serious and unexpected adverse events or death related to the drugs or radiotherapy must be reported to the study coordinator immediately. Serious adverse events (SAE) to be reported include all deaths during or within 30 days of protocol treatment regardless of cause, grade 5 toxicity, life-threatening grade 4 toxicity, and/or unexpected toxicity. The Study Coordinator of respective center should complete form and fax this within 24 hours to the Principal Investigator (Dr. Yan-Qun Xiang, Tel: 020-87343379, Fax: 020-87343379), the center of clinical trials, the institutional ethic committee and Sun Yat-Sen University Cancer Center. Together with the Principal Investigator, appropriate and prompt action will be taken if warranted. Reactions and deaths beyond 30 days from protocol treatment that are judged definitely unrelated to treatment should not be reported.

# **Administration of Experimental Drugs**

Jiangsu Hengrui Pharmaceutical provided nab-paclitaxel and apatinib free of charge and camrelizumab free of partial charge. The management, distribution, and recovery of clinical drugs in this trial shall be the responsibility of designated researcher. The researcher must ensure that all trial drugs are used only for subjects participating in the clinical trial, that their doses and usage are in accordance with the trial scheme, and that the remaining drugs are returned to the manufacturer. Experimental drugs should not be transferred to any non-clinical trial participant.

# **Progress of Study**

Expected trial start time: May 2020;

Expected completion time: May 2021;

Expected end of trial: May 2026.

# **Principle center and investigator**

Principle center: Sun Yat-Sen University Cancer Center

Principle Investigator: Yan-Qun Xiang

Address: Dongfeng East Road 651, Guangzhou 510060

Telephone: 020-87343379

Fax: 020-87343379

# **Bibliography**

1. Chen YP, Chan ATC, Le QT, Blanchard P, Sun Y, Ma J. Nasopharyngeal carcinoma. Lancet (London, England) 2019;394:64-80.

2. Huang ZL, Liu S, Wang GN, et al. The prognostic significance of PD-L1 and PD-1 expression in patients with nasopharyngeal carcinoma: a systematic review and meta-analysis. Cancer Cell Int 2019;19:141.

3. Mai HQ, Chen QY, Chen D, et al. Toripalimab or placebo plus chemotherapy as first-line treatment in advanced nasopharyngeal carcinoma: a multicenter randomized phase 3 trial. Nature medicine 2021.

4. Wang FH, Wei XL, Feng J, et al. Efficacy, Safety, and Correlative Biomarkers of Toripalimab in Previously Treated Recurrent or Metastatic Nasopharyngeal Carcinoma: A Phase II Clinical Trial (POLARIS-02). Journal of clinical oncology : official journal of the American Society of Clinical Oncology 2021;39:704-12.

5. Fang W, Yang Y, Ma Y, et al. Camrelizumab (SHR-1210) alone or in combination with gemcitabine plus cisplatin for nasopharyngeal carcinoma: results from two single-arm, phase 1 trials. The Lancet Oncology 2018;19:1338-50.

6. Yang Y, Qu S, Li J, et al. Camrelizumab versus placebo in combination with gemcitabine and cisplatin as first-line treatment for recurrent or metastatic nasopharyngeal carcinoma (CAPTAIN-1st): a multicentre, randomised, double-blind, phase 3 trial. The Lancet Oncology 2021;22:1162-74.

7. Schmittnaegel M, Rigamonti N, Kadioglu E, et al. Dual angiopoietin-2 and VEGFA inhibition elicits antitumor immunity that is enhanced by PD-1 checkpoint blockade. Science translational medicine 2017;9.

8. Allen E, Jabouille A, Rivera LB, et al. Combined antiangiogenic and anti-PD-L1 therapy stimulates tumor immunity through HEV formation. Science translational medicine 2017;9.

9. Xu J, Zhang Y, Jia R, et al. Anti-PD-1 Antibody SHR-1210 Combined with Apatinib for Advanced Hepatocellular Carcinoma, Gastric, or Esophagogastric Junction Cancer: An Open-label, Dose Escalation and Expansion Study. Clinical cancer research : an official journal of the American Association for Cancer Research 2019;25:515-23.

10. Li Q, Wang Y, Jia W, et al. Low-Dose Anti-Angiogenic Therapy Sensitizes Breast Cancer to PD-1 Blockade. Clinical cancer research : an official journal of the American Association for Cancer Research 2020;26:1712-24.

11. Liu J, Liu Q, Li Y, et al. Efficacy and safety of camrelizumab combined with apatinib in advanced triple-negative breast cancer: an open-label phase II trial. J Immunother Cancer 2020;8.

12. Xie L, Xu J, Sun X, et al. Apatinib plus camrelizumab (anti-PD1 therapy, SHR-1210) for advanced osteosarcoma (APFAO) progressing after chemotherapy: a single-arm, open-label, phase 2 trial. J Immunother Cancer 2020;8.

13. Sun X, Su S, Chen C, et al. Long-term outcomes of intensity-modulated radiotherapy for 868 patients with nasopharyngeal carcinoma: an analysis of survival and treatment toxicities. Radiotherapy and oncology : journal of the European Society for Therapeutic Radiology and Oncology 2014;110:398-403.

# **Appendix I: The 8th editions of the AJCC Staging System of Nasopharyngeal Carcinoma**

| **Tumor stage** | |
| --- | --- |
| Tx | Primary tumour cannot be assessed |
| T0 | No tumour identified, but there is EBV-positive cervical node(s) involvement |
| T1 | Nasopharynx, oropharynx, or nasal cavity without parapharyngeal extension |
| T2 | Parapharyngeal extension, adjacent soft tissue involvement (medial pterygoid, lateral pterygoid, prevertebral muscles) |
| T3 | Bony structures (skull base, cervical vertebra) and/or paranasal sinuses |
| T4 | Intracranial extension, cranial nerve, hypopharynx, orbit, extensive soft tissue involvement (beyond the lateral surface of the lateral pterygoid muscle, parotid gland) |
| **Node stage** | |
| Nx | Regional lymph nodes cannot be assessed |
| N0 | No regional lymph node metastasis |
| N1 | Unilateral cervical, unilateral, or bilateral retropharyngeal lymph nodes, above the caudal border of cricoid cartilage; ≤ 6 cm |
| N2 | Bilateral metastasis in lymph node(s), ≤ 6 cm in greatest dimension, above the caudal border of cricoid cartilage |
| N3 | > 6 cm and/or below caudal border of cricoid cartilage (regardless of laterality) |
| **Metastasis** | |
| M0 | No distant metastasis |
| M1 | Distant metastasis |
| **TNM stage** | |
| I | T1 N0 M0 |
| II | T2 N0–1 M0, T0–1 N1 M0 |
| III | T3 N0–2 M0, T0–2 N2 M0 |
| IVa | T4 or N3 M0 |
| IVb | Any T, any N, M1 |

# **Appendix II: ECOG Performance Status and Scores**

| **Score** | **ECOG Performance status*** |
| --- | --- |
| 0 | Fully active, able to carry on all pre-disease performance without restriction |
| 1 | Restricted in physically strenuous activity but ambulatory and able to carry out work of a light or sedentary nature, e.g., light housework, office work |
| 2 | Ambulatory and capable of all selfcare but unable to carry out any work activities; up and about more than 50% of waking hours |
| 3 | Capable of only limited selfcare; confined to bed or chair more than 50% of waking hours |
| 4 | Completely disabled; cannot carry on any selfcare; totally confined to bed or chair |
| 5 | Dead |
| * Oken M, Creech R, Tormey D, et al. Toxicity and response criteria of the Eastern Cooperative Oncology Group. Am J Clin Oncol. 1982;5:649-655.  Note: ECOG denotes Eastern Cooperative Oncology Group | |

# **Appendix III:** **Acute Induction Chemotherapy and Chemoradiotherapy Toxicity Graded by Common Terminology Criteria for Adverse Events (CTCAE 5.0).**

The CTCAE v5.0 manual can be found at the following URL: https://evs.nci.nih.gov/ftp1/CTCAE/CTCAE_5.0/

# **Appendix IV: Late Onset Toxicities Graded by RTOG/EORTC System**

RTOG/EORTC System manual can be found at the following URL: https://www.eortc.org/rog-guidelines/

Efficacy and Safety of Camrelizumab and Apatinib Combined with Induction Chemotherapy and Concurrent Chemoradiotherapy for Stage TanyN3M0 Nasopharyngeal Carcinoma: A Phase II QUINTUPLED Trial

# **Final protocol (Second version: March 20, 2021)**

Trial Code: QUINTUPLED

| Principal Investigator | Dr. Yan-Qun Xiang  Department of Nasopharyngeal Carcinoma  Cancer Center, Sun Yat-Sen University  651 Dongfeng Road East, Guangzhou, China  Tel: (020)-87343379; Fax: (020)-87343379  E-mail: xiangyq@mail.sysu.edu.cn |
| --- | --- |
| Participating Center |  |
| Sun Yat-Sen University Cancer Center, Guangzhou, China | |
| Lead investigators | Dr. Yan-Qun Xiang |
|  | Dr. Chong Zhao  Department of Nasopharyngeal Carcinoma |
|  | Dr. Changqing Xie  Thoracic and GI Malignancies Branch  National Cancer Institute, NIH |
| Data Manager & Statistician | Dr. Qing Liu  Department of Medical Statistics and Epidemiology, Cancer Center, Sun Yat-Sen University  Dr. Yan-Fang Ye  Clinical Research Design Division, Sun Yat-Sen Memorial Hospital, Sun Yat-Sen University |
| Honorary Adviser | Dr. Xiang Guo  Dr. Hai-Qiang Mai  Department of Nasopharyngeal Carcinoma  Cancer Center, Sun Yat-Sen University |
| Activation Date |  |
| First approved version: April 25, 2020 | |
| Current Edition: March 20, 2021 | |

# **Background**

Nasopharyngeal carcinoma (NPC) differs from other head and neck cancers with unique geographical, etiological, and biological features.1 It is endemic in the area of Southern China, Southeast Asia, and North Africa. More than 70% of NPC patients are classified as having locoregionally advanced disease among the 129,000 newly diagnosed cases annually.1 Induction chemotherapy followed by concurrent chemoradiotherapy is the current standard treatment for locoregionally advanced NPC, recommended by the National Comprehensive Cancer Network (NCCN) Guidelines as level 1 evidence. With the application of MRI, intensity-modulated radiotherapy and combined chemoradiotherapy has substantially improved locoregional control. However, distant metastasis predominates as the pattern of treatment failure. In particular, approximately 50% of patients with TanyN3M0 diseases eventually develop distant metastasis after undergoing abovementioned radical treatment. Therefore, more effective treatment strategies are needed for this patient population.

Due to the properties of NPC with the abundant lymphocytic infiltrations and elevated expressions of programmed death-ligand 1 (PD-L1)2, immune checkpoint blockade therapy has considerable therapeutic potential for patients with NPC. Its effect on the treatment has confirmed in recurrent or metastatic NPC (RM-NPC) in the first-, second-, and greater-line settings.3-6 However, there are no available reports assessing the value of adding immunotherapy to standard treatment in the curative setting to date.

Camrelizumab (SHR-1210) is a fully humanized immunoglobulin G4/k PD-1 monoclonal antibody, which is well tolerated with positive antitumor activity in RM-NPC. At the same time, antiangiogenic therapies have been shown to sensitize anti-PD-1/PD-L1 treatment by increasing PD-L1 expression and CD8+ T cell infiltration in preclinical models.7,8 Remarkably, apatinib, an orally administered vascular endothelial growth factor receptor 2 (VEGFR2) tyrosine kinase inhibitor, has demonstrated antitumoral activity and synergetic effects with camrelizumab in several solid tumors.9-12 Therefore, we evaluated the effect and safety of the combination of camrelizumab and apatinib with standard treatment regimen as the curative setting in stage TanyN3M0 NPC.

# **Objectives**

## **Primary Objectives**

To assess distant metastasis-free survival of camrelizumab plus apatinib combined with induction chemotherapy (TPC; NAB-paclitaxel, cisplatin and capecitabine) and concurrent chemoradiotherapy for high-risk of metastatic NPC patients (stage TanyN3M0).

## **Secondary Objectives**

To evaluateresponse rate, overall survival (OS), failure-free survival (FFS) rate, locoregional recurrence-free survival (LRFS), toxicity profile, treatment adherence of camrelizumab plus apatinib combined with induction chemotherapy (TPC; NAB-paclitaxel, cisplatin and capecitabine) and concurrent chemoradiotherapy for high-risk of metastatic NPC patients (stage TanyN3M0).

# **Trial Scheme**

Nasopharyngeal carcinoma

Histology: non-keratinizing

Staging: TanyN3M0 by AJCC 8th system*

Induction phase

3 cycles of Camrelizumab and Apatinib combined with induction chemotherapy (TPC; NAB-paclitaxel, cisplatin and capecitabine)

Concurrent chemoradiotherapy phase

Intensity-modulated radiotherapy with 2 cycles of concurrent cisplatin and Camrelizumab every 3 weeks

Maintenance phase

Camrelizumab every 3 weeks up to 1 year

Primary endpoint: Distant metastasis-free survival

Secondary endpoint: Treatment response, toxicity profile, overall survival, failure-free survival, local relapse-free survival, treatment adherence

*The 8th edition of the American Joint Commission on Cancer staging system.

# **Subject Enrollment**

## **Eligibility Criteria**

1. Patients newly diagnosed with histologically confirmed differentiated or undifferentiated non-keratinized carcinomas (according to the world health organization [WHO] histologically type).
2. Patients with tumors staged as TanyN3M0 (as defined by the 8th AJCC edition, appendix I).
3. No sign of distant metastasis.
4. Without previous anticancer treatment.
5. Without a history of other malignancies.
6. Age between 18-65 years.
7. Adequate bone marrow function: White blood cell count of ≥ 4.0×109/L, absolute neutrophil count (ANC) of ≥ 2.0×109/L, platelet count of ≥ 100×109/L, and hemoglobin concentrations of ≥ 90 g/L.
8. Sufficient renal function: creatinine clearance rate at greater than or equal to 60 mL/min.
9. Normal liver function: aspartate aminotransferase (AST) and alanine aminotransferase (ALT) ≤ 2.0 times the upper limit of normal (ULN).
10. Eastern Cooperative Oncology Group performance status of 0 or 1.
11. Signed informed consent form.

## **Exclusion Criteria**

1. Patients suffering from basaloid squamous cell carcinoma or WHO Type keratinizing squamous cell carcinoma.
2. Previous anticancer treatment, including chemotherapy, radiotherapy, and surgery (except diagnostic).
3. The presence of distant metastasis at initial diagnosis.
4. Patients who are pregnant or lactating (in women of child-bearing age, pregnancy test should be considered and effective contraception during the treatment period should be emphasized).
5. Patients suffering from any severe uncontrollable infections, serious physical or mental diseases or abnormal laboratory tests, which may incur unacceptable risk, negatively affect trial compliance, or affect the administration, distribution, metabolism, and excretion of study drugs. For example, unstable cardiac disease necessitating treatment, chronic hepatitis renal disease, poorly controlled diabetes (fasting plasma glucose greater 1.5 × the ULN), emotional disturbance, mental disorders, abnormal central nervous system, chronic diarrhea, ascites, and pleural effusion.
6. Hypertension, and cannot be well controlled by antihypertensive drugs (systolic blood pressure > 140 mmHg or diastolic blood pressure > 90 mmHg).
7. Human immunodeficiency virus (HIV) infection or known acquired immunodeficiency syndrome (AIDS), untreated active hepatitis (hepatitis B is defined as HBV-DNA ≥ 500 IU/ml; hepatitis C is defined as HCV-RNA higher than the detection limit of the analytical method) or co-infection of hepatitis B and C.
8. Patients who cannot cooperate with routine follow-up because of psychological, social, family, or geographical reasons.
9. Patients with a history of other malignancies before admission.
10. Patients with a history of psychotropic substance abuse or drug use.
11. Receive experimental treatment from other clinical studies at the same time (during the treatment period of this trial).
12. Refuse to sign the informed consent form.
13. Long-term use of immunosuppressive agents after organ transplantation.

## **Criteria for withdrawal from protocol treatment**

The reasons for subjects’ withdraw from the study may include:

1. Evidence of disease recurrence.
2. The patient may withdraw from the study and reject further follow-up at any time for any reason. The reason should be recorded.
3. Unacceptable toxicity, the reasons for which must be recorded.
4. The test results of the subject's β-HCG test indicated that the subject was pregnant. At the same time, pregnancy will also be reported as a serious adverse event reporting procedure.
5. Use of prohibited medications or other medications that the investigator believes will cause a toxic reaction or affect the results of the study.
6. Patients suffering from an intercurrent disease that significantly affects the assessment of clinical status or necessitates discontinuation of the drug, or both.
7. Investigators believe that the termination of treatment is beneficial to patients according to their physical condition.
8. Death.

# **Treatment Plan**

## **Pretreatment Assessment**

All patients are under standardized management for NPC, and they need to perform a series of examinations as well as provide relevant information to confirm pathologic diagnosis and clinical stage before admitted into trial:

1. Signed informed consent.
2. Medical history review.
3. Personal data collection.
4. Current medications and treatment.
5. Body examinations, include height, weight and vital signs.
6. Physical examination of head and neck region, include nasopharynx and cervical lymph nodes.
7. Physical examination of the nervous system.
8. Nasal endoscopy and lesion biopsy.
9. Complete blood count and differential, electrolytes and liver function test.
10. Urinalysis.
11. EBV antibodies and EBV DNA testing.
12. Virological examination (completed within 14 days prior to the first dose): HBsAg (if positive, HBV-DNA is required), HBsAb, HBeAg, HBeAb, HBcAb, HCV-Ab (if positive, HCV-RNA is required) , HIV-Ab.
13. Thyroid function.
14. Coagulation function.
15. Electrocardiogram and Echocardiography.
16. Imaging, including enhanced MRI or enhanced CT of the head and neck (CT is indicated only in patients with contraindication to MRI).
17. Chest CT.
18. ECT bone scan.
19. Abdominal CT/MR.
20. PET/CT is optional and is performed at the discretion of the attending physician.
21. Pregnancy test (applicable to women of childbearing age).

## **Pretreatment Staging Criteria**

The disease stage of subjects will be staged according to the 8th edition of the Union for International Cancer Control / American Joint Committee on Cancer (UICC/AJCC) staging system (Appendix I).

## **Chemotherapy, target and immunotherapy**

5.3.1 Induction therapy phase

1. Camrelizumab

Camrelizumab was intravenously given at dose of 200 mg, administered as a 30-minutes (no less than 20 minutes, no more than 60 minutes) infusion on day 1. In particular, an actual dose of 3 mg/kg was given to those weighing less than 40 kg. Camrelizumab will be administrated throughout the trial every three weeks up to one year.

2. Induction chemotherapy with TPC regimen

The TPC regimen consisted of NAB-paclitaxel at a dose of 200 mg per square meter, administered over 30 minutes infusion on day 1, followed by cisplatin at a dose of 60 mg per square meter on day 1; No premedication against allergic reaction was given before the NAB-paclitaxel; And capecitabine at a dose of 1000 mg per square meter, taken orally twice a day on days 1 to 14; repeat every 21 days for 3 cycles.

After the infusion of camrelizumab, NAB-paclitaxel and cisplatin are successively administered intravenously after an interval of at least 30 min.

3. Apatinib

Apatinib taken orally at a dose of 250 mg daily on days 1 to 5 per week for a total of 8 weeks. The drug should be administered on the first day of initial treatment and discontinued one week before radiotherapy.

5.3.2 Concurrent chemotherapy with cisplatin

Concurrent chemotherapy with cisplatin

The concurrent chemotherapy consisted of cisplatin at a dose of 100 mg per square meter, administered as a 4-hour infusion; repeat every 21 days for 2 cycles.

Cisplatin administration follows local hydration protocols to prevent/minimize nephrotoxicity. Pre-hydration (at least 12 hours before cisplatin administration, D0) and post-hydration (D1-3) with over 2000 ml of normal saline infused each time are both needed. The use of mannitol (D1) and furosemide (D1) is essential for it helps to reduce cisplatin-related nephrotoxicity by diuresis. Twenty-four hours urinary output should be recorded (D0-D3) and urinalysis will be performed (D2-D3). Electrolytes and serum creatinine are monitored during treatment and a follow-up creatinine within 24-48 hours of the cisplatin dose is recommended. One hour before concurrent chemotherapy, patients are given 5-hydroxytryptamine-3 receptor antagonists for anti-nausea (D1). The NK-1 receptor antagonist aprepitant QD were recommended in D1-D3.

## **Radiotherapy**

### **Radiation Therapy**

Radiation therapy with intensity-modulated radiotherapy (IMRT) techniques is mandatory. Target volumes are defined following the International Commission on Radiation Units and Measurements (ICRU) reports 50 and 62. The principle of target volume determination for IMRT and prescribed dose and fractionation areas are described as follows.

### **Target Volume Determination for IMRT**

Gross tumor volume (GTV)

1. Gross tumor target volume of primary nasopharyngeal focus (GTVnx): primary nasopharyngeal tumors and their invasive areas revealed by clinical examination and imaging examination.
2. Clinically involved gross cervical lymph nodes (GTVnd): cervical metastatic lymph nodes clinically affected and/or imaged (imaging diagnostic criteria: a. short diameter >1 cm; b. necrotic focus in the center; c. extracapsular invasion; d. clustered or clustered short diameter >0.8 cm).

Clinical target volume (CTV)

1. Nasopharyngeal clinical target volume I (CTV1, nasopharyngeal high-risk area): GTVnx expands 0.5-1.0 cm forward, upper, lower, and bilateral, and 0.2-0.3 cm backward (according to the characteristics of adjacent tissue structure), which should also include all nasopharyngeal mucosa and 0.5 cm below.
2. Clinical target volume II (CTV2, nasopharyngeal low-risk area, cervical metastatic lymph node area, and cervical area requiring preventive irradiation): CTV1 expands 0.5-1.0 cm forward, upper, lower, and bilateral, 0.2-0.3 cm backward (according to adjacent tissue structure characteristics) including the lymphatic drainage area of GTVnd and extends to negative lymph node drainage area requiring preventive irradiation (Table 1).

| **Table 1.** Cervical preventive exposure areas | |
| --- | --- |
| Lymph node metastasis | Cervical lymph node area (CTV2 neck) requiring radiation prevention |
| II | Ipsilateral II, III, IV, Va, Vb |
| III | Ipsilateral II, III, IV, Va, Vb |
| Va | Ipsilateral II, III, IV, Va, Vb |
| IV | Ipsilateral II, III, IV, Va, Vb, supraclavicular region |
| Vb | Ipsilateral II, III, IV, Va, Vb, supraclavicular region |
| Unilateral neck | Contralateral zones II, III, Va |

Note: Indications of area are included in CTV2: (1) metastatic lymph nodes in area IIa (> 3 cm); (2) extracapsular invasion of metastatic lymph nodes in area IIa; (3) the metastatic lymph nodes in area IIa push the submandibular gland or have no clear demarcation with the submandibular gland; (4) lymph node metastasis in multiple areas of the ipsilateral whole neck (>4 areas).

Planned target volume (PTV)

PTVnx, PTVnd, PTV1, and PTV2 are GTVnx, GTVnd, CTV1, and CTV2, respectively, with expansion to a certain distance, generally 0.3 cm in the forward, upper, lower, left and right directions, and 0.1-0.2 cm in the backward direction.

### **Prescribed Dose and Fractionation**

All patients will be treated with IMRT using simultaneously integrated boost, 5 fractions per week. The prescribed dose is PTVnx: 68-72 Gy/30-33F, PTVnd: 64-68 Gy/30-33F, PTV1: 60-64 Gy/30-33F, PTV2: 54-58 Gy/30-33F, for the PTVs derived from GTVnx, GTVnd, CTV1, and CTV2, respectively.

### **Normal Tissue Dose Constraints**

| **Table 2.** Normal tissue dose constraint structure. | |
| --- | --- |
| **Structure** | **Dose constraints** |
| **Critical organ at risk** |  |
| Brain stem | Dmax ≤ 54 Gy |
| PRV-Brain stem | D1 ≤ 60 Gy |
| Spinal cord Dmax* | Dmax* ≤ 45 Gy |
| PRV-Spinal cord | D1†≤ 50 Gy |
| Optic nerve | Dmax ≤ 54 Gy |
| PRV-Optic nerve | D1 ≤ 60 Gy |
| Optic chiasm | Dmax ≤ 54 Gy |
| PRV-Optic chiasm | D1 ≤ 60 Gy |
| Temporal lobe | Dmax ≤ 60 Gy |
| PRV-Temporal lobe | D1 ≤ 65 Gy |
| **Intermediate-risk organ at risk** |  |
| Pituitary | Dmax < 60 Gy |
| Mandibular | Dmax < 70 Gy |
| Temporomandibular Joint | Dmax < 70 Gy |
| Lens | Dmean‡ < 8 Gy |
| Eyes | Dmean < 35 Gy |
| **Low-risk organ at risk** |  |
| Parotid | Dmean < 26 Gy |
| Parotid | V30¶ < 50% |
| Cochlea | Dmean < 50 Gy |
| Tongue | Dmean < 45 Gy |
| Larynx | Dmean < 45 Gy |
| PRV = planning organ at risk volume.  * Maximum point dose to the target volume.  † Dose received by 1% of the target volume.  ‡ Mean dose to the target volume.  ¶ At least 50% of the gland will receive <30 Gy (should be achieved in at least one gland) | |

### **Radiotherapy Adjustments for Non-hematological Toxicity**

Side effects of radiotherapy may include anorexia, mucositis and skin reaction. The investigator will manage these conditions according to clinical practice. No radiotherapy dose modifications are allowed. Treatment interruptions are allowed if symptomatic mucositis or skin reactions occur that, in the judgment of the attending clinician, warrants a break. The treatment is completed according to protocol for treatment breaks up to and including 14 days. If the break exceeded 14 days, the patient is removed from protocol treatment, completing treatment at the discretion of his or her physician but followed up and included in the analysis.

### **Radiotherapy Adjustments for Hematological Toxicity**

Radiotherapy will be withheld until ANC > 0.5×109/L and platelet > 25×109/L.

## **Salvage Therapy**

Nasopharyngeal surgery, neck dissections, secondary radiotherapy, chemotherapy, or immunotherapy may be given to patients with relapse or metastasis after treatment according to guidelines of National Comprehensive Cancer Network (NCCN).

# **Dosage Adjustment Principle for chemotherapy**

## **General principle for dosage adjustment**

1. Assessment and grading for toxicity in patients will be carried out using the the Common Terminology Criteria for Adverse Events, version 5.0, of the National Cancer Institute (NCI CTCAE V5.0).
2. There will be no dose escalation of NAB-paclitaxel, cisplatin and capecitabine (TPC) regimen.
3. Chemotherapy dosage modifications based on nadir counts and interim nonhematological toxicities from the preceding cycle.
4. Dosage may not be reduced or discontinued if the investigator considers that the adverse reaction is unlikely to develop into a serious or life-threatening events and will not result in delay or interruption of treatment. There is no need to reduce the dosage or discontinue treatment if anemia can be well alleviated by blood transfusion.
5. A delay of up to 3 weeks for a cycle will be permitted to allow for the severity of toxic events of grade 3/4 to be reduced to grade 1 or less (except for alopecia, fatigue, malaise, and nail changes). Delays in excess of 3 weeks will necessitate require discontinuation of chemotherapy unless continued therapy is deemed necessary by the investigator.
6. Chemotherapy must be withheld until the neutrophil count is > 1.5×109/L and the platelet count is > 100×109/L.
7. Missing capecitabine doses due to toxicity should be no longer replenished or resumed, and the patient continued the scheduled course of treatment instead.
8. If creatinine clearance was less than 70 ml/min but greater than 50 ml/min at any time during the previous chemotherapy course. The dose of cisplatin should be reduced by 50% during the next cycle of chemotherapy. If the creatinine clearance rate was less than 50 ml/min during the previous chemotherapy course, subjects should discontinue study therapy.

## **Dosage adjustment due to hematologic adverse events**

The hematological toxicity is assessed according to the NCI CTC AE V5.0 classification standard, and the dosage adjustment of NAB-paclitaxel and cisplatin is performed according to the following principles.

| Dosage adjustment of NAB-paclitaxel and cisplatin for hematologic toxicitya | | | | |
| --- | --- | --- | --- | --- |
| Toxicity | Grade | Time | NAB-paclitaxel | Cisplatin |
| Anemia | Any | Any | Full dosage | Full dosage |
| Neutropeniab | Grade 3 | Any | Full dosage | Full dosage |
| Grade 4 | First time | 160 mg/m2 | 50 mg/m2 |
| Second time | 120 mg/m2 | 40 mg/m2 |
| Third time | Stop | Stop |
| Neutropenic feverc | Grade 3-4 | First time | 160 mg/m2 | 50 mg/m2 |
| Second time | 120 mg/m2 | 40 mg/m2 |
| Third time | Stop | Stop |
| Thrombocytopenia | Grade 4 | First time | 160 mg/m2 | 50 mg/m2 |
| Second time | 120 mg/m2 | 40 mg/m2 |
| Third time | Stop | Stop |
| Note:   1. Grade 3 neutropenia or thrombocytopenia, which does not result in prolonged chemotherapy interval, does not require dosage reduction. If this leads to prolonged chemotherapy interval, G-CSF or platelet-enhancing drug support may be considered for the next course of treatment. If this is still not resolved, the dosage should be reduced with the reference to the corresponding grade 4. 2. Grade 3 or 4 neutropenia may be consideration for prevention with G-CSF support during the next course of treatment. 3. Grade 3 or 4 neutropenic fever may be prevented with G-CSF support while the dosage is reduced during the next cycle of treatment. The definition of neutropenic fever: ANC < 1.0×109/L with fever ≥ 38.5 ℃ for grade 3 and ANC < 1.0×109/L with fever ≥ 38.5 ℃ with life-threatening sepsis for grade 4. | | | | |

## **Dosage adjustment due to non-hematologic adverse events**

### NAB-paclitaxel

Peripheral neuritis and extremities joint myalgia

If a patient develops one of the above symptoms, the following methods are recommended to adjust the dosage of NAB-paclitaxel according to the duration and severity of the symptoms. Symptomatic treatment with non-steroidal anti-inflammatory drugs can be given alleviate extremities joint myalgia.

| Dose adjustment of NAB-paclitaxel for non-hematologic toxicity | | | | |
| --- | --- | --- | --- | --- |
| Adverse events | Grade | Duration of adverse events | | |
| 1-7 days | Over 7 days | Persistent during treatment |
| Pain/paresthesia/sensory disturbances, but does not affect function | 1 | Full dose | Full dose | 160 mg/m2 |
| Pain/paresthesia/sensory disturbances that affect function but do not affect daily activities | 2 | Full dose | Full dose | 120 mg/m2 |
| Pain/paresthesia/sensory disturbances, with functional impairment, and interference with daily activities | 3 | Full dose | 120 mg/m2 | Stop |
| Pain/paresthesia/sensory disturbances resulting in loss of function or life threating | 4 | Stop | Stop | Stop |

Abnormal bilirubin and impaired liver function

For HBs-Ag positive or serum HBV DNA positive patients, prophylactic anti-HBV drugs should be used before treatment. If the liver function damage after chemotherapy is caused by the activation of hepatitis B virus, anti-hepatitis B virus drug therapy should be strengthened, and positive symptomatic treatment should be carried out. If grade 2 liver toxicity occurs, there is no need for adjusting NAB-paclitaxel dosage, but if grade 3 liver toxicity occurs, NAB-paclitaxel dosage should be reduced by 20%. Whenever grade 4 liver toxicity occurs, NAB-paclitaxel should be permanently discontinued. If grade 2-4 toxicity occurs, medication will be suspended until the toxicity returns to grade 1 or below before restarting treatment.

Other toxicity

If other grade 3 or less toxic reactions occur, symptomatic treatment should be given as far as possible, with no reduction of NAB-paclitaxel for the next course of treatment. If grade 3 toxicity occurs, when the toxicity reverts from grade 3 to grad 1 or below, the dosage of NAB-paclitaxel for the next course of treatment is reduced by 20%. If grade 4 toxicity occurs, treatment with NAB-paclitaxel should be permanently discontinued. However, in the event of certain grade 3 or higher adverse events (i.e., fatigue, changes in sexual function, and dry skin without clinical significance), the investigator may continue the treatment at her or his discretion.

### Cisplatin

Other non-hematological toxicity

If other toxicity reaction less than grade 3 occur, symptomatic treatment should be given whenever possible. If grade 3 or 4 toxicity occurs, treatment should be suspended, and when toxicity reverts to grade 1 or below, cisplatin should be administered at 80% of the initial dosage for the next course of treatment.

### Capecitabin

Once the dosage of capecitabin has been reduced, it should not be increased later. Dosage adjustment is not recommended when grade 1 adverse events occur. Capecitabin treatment should be suspended if grade 2 or 3 adverse events occur. Treatment can be restarted with the original dosage of capecitabin or at the dosage adjusted in the following principles once the adverse reaction has disappeared or the severity has reduced to grade 1. If grade 4 adverse reactions occur, treatment should be suspended until the adverse reactions disappear or the severity is reduced to grade 1, and then treatment should be restarted at 50% of the original dosage. Missing capecitabine doses due to toxicity should be no longer replenished or resumed, and the patient continued the scheduled course of treatment instead.

The detailed dose adjustment of capecitabine is performed according to the following principles.

| **Table 3:** Dose adjustment of capecitabine. | | |
| --- | --- | --- |
| **NCI assessed advent events** | **During treatment** | **Dose of the next cycle (% original dose)** |
| **Grade 1** | Full dose | Full dose |
| **Grade 2** | | |
| First time | Suspended until returned to grade 0~1 | 100% |
| Second time | Suspended until returned to grade 0~1 | 75% |
| Third time | Suspended until returned to grade 0~1 | 50% |
| Fourth time | Permanent termination |  |
| **Grade 3** | | |
| First time | Suspended until returned to grade 0~1 | 75% |
| Second time | Suspended until returned to grade 0~1 | 50% |
| Third time | Permanent termination |  |
| **Grade 4** | | |
| First time | Permanent termination or suspended until returned to grade 0~1 if researcher believe it is in the patient's interest to continue treatment | 50% |
| Note: patients with hand-foot syndrome would be recommended treated with topical emollient, topical corticosteroid cream, or creams containing urea. | | |

### Apatinib

Adverse reactions should be closely monitored during treatment and the dose should be adjusted as needed to enable patients to tolerate the treatment. Once the dose of the drug has been reduced, it should not be increased later. Apatinib 250 mg is recommend orally administrated daily, 5 days every week. In case of adverse reactions related to apatinib, dose frequency should be adjusted according to the following conditions: The recommended frequency should be reduced to:

- 250 mg every two days for the first adjustment;
- Suspended if the relative adverse events occurred second time; After the drug reaction disappeared, the dose before the adjustment could be restored.
- If the patient is still intolerant, stop apatinib permanently.

Hypertension

For patients with hypertension, antihypertensive drugs should be used reasonably before the initiation of apatinib administrated, and blood pressure should be closely monitored during treatment. For patients with grade 1 or 2 hypertension (120-159 mmHg systolic pressure or 80-99 mmHg diastolic pressure) during treatment, there is no need to adjust the dose of apatinib; For grade 3 hypertension (systolic pressure ≥ 160mmHg or diastolic pressure ≥ 100mmHg), apatinib should be stopped. After drug management intervention, apatinib can be continued with reduced dosage if blood pressure is well controlled. Patients with grade 4 hypertension, such as hypertensive crisis and other malignant hypertensive reactions, need to stop taking apatinib immediately and permanently.

Proteinuria

Urine protein should be monitored closely during treatment. Urine routines and/or 24-hour proteinuria are recommended every 2 weeks for the first 2 months and every 4 weeks thereafter. There is no need to adjust the dose of apatinib for grade 1 or 2 urine protein during the treatment. Apatinib should be stopped for grade 3 (24-hour urine protein quantification ≥ 3.5 g), and drug intervention should be performed. After proteinuria is restored to grade 2 or below, apatinib can be continued with reduced dosage. If grade 3 proteinuria occurs again after twice reduction, apatinib should be stopped permanently.

Hand and foot skin reaction

It is recommended that the hands and feet skin reaction drug prevention intervention can be applied with urea ointment, moisturizing cream or aloe gel on the skin of hands and feet from the first day of taking apatinib. For grade 1 reaction, local symptomatic support is recommended without dose adjustment; For grade 2 reaction, dose can be adjusted appropriately; For grade 3 reaction, apatinib should be suspended; After symptomatic support, apatinib can be continued with reduced dosage; if the reaction persist or aggravate, apatinib should be discontinued.

Bleeding or thrombosis

For patients with symptoms of any-reason nosebleed, apatinib should be suspended until the bleeding disappears and apatinib can be continued without dose adjustment. For grade 2 venous thrombosis, symptomatic treatment and close monitoring was recommended without dose adjustment; For grade 3 or asymptomatic grade 4 reaction, apatinib should be stopped and treated with anticoagulation for at least one week. When the symptoms of thrombosis improve and grade 3-4 bleeding does not occur, apatinib can be continued with adjusted dose, otherwise the drug should be stopped.

Gastrointestinal reaction

For patients with grade 1 reaction, local symptomatic support is recommended without dose adjustment. For grade 2 reaction, especially diarrhea, vomiting and other symptoms, apatinib should be suspended if symptoms did not relieve after symptomatic treatment; For grade 3-4 reaction, apatinib should be discontinued immediately.

Impaired liver function

For HBs-Ag positive and/or serum HBV DNA positive patients, prophylactic anti-HBV drugs should be used before treatment. If the liver function damage after treatment is caused by the activation of hepatitis B virus, anti-hepatitis B virus drug therapy should be strengthened, and positive symptomatic treatment should be carried out. If grade 1 or 2 liver toxicity occurs, there is no need for adjusting dosage, but if grade 3 or 4 liver toxicity occurs, apatinib dosage should be suspended, and the dosage should be performed with first dosage reduction after toxicity decreasing to grade 1.

### Camrelizumab

The adverse events related to camrelizumab may be immunologically related and may occur shortly after the first dose or several months after the last dose. If the situation listed the following table occurs, the administration of camrelizumab should be suspended. If the investigator considers the benefit/risk ratio of the subject during the clinical operation and believes that the operation listed the following table cannot be performed or encounters situations not listed in the following Table, the investigator must suspend or resume the administration of camrelizumab.

The dose adjustment of camrelizumab is performed according to the following principles.

| **Table 4**: Dose adjustment of camrelizumab | | |
| --- | --- | --- |
| **Adverse events** | **Grade** | **Treatment adjustment** |
| Reactive capillary endothelial proliferation* | Grade 3 | Suspend drug |
| Grade 4 | Permanent withdrawal |
| **Immune-related adverse events** | | |
| Pneumonia | Grade 2 | Suspend drug until recover to Grade 0-1 |
| Grade 3-4 or Recurrent Grade 2 | Permanent withdrawal |
| Diarrhea and colitis | Grade 2-3 | Suspend drug until recover to Grade 0-1 |
| Grade 4 | Permanent withdrawal |
| Hepatitis | Grade 2 | Suspend drug until recover to Grade 0-1 |
| Grade 3-4 | Permanent withdrawal |
| Nephritis | Grade 2-3 elevated creatinine | Suspend drug until recover to Grade 0-1 |
| Grade 4 elevated creatinine | Permanent withdrawal |
| Endocrine disease | Grade 2-3 | Suspend drug until recover to Grade 0-1 |
| Grade 4 | Permanent withdrawal |
| Cutaneous AEs | Grade 3 | Suspend drug until recover to Grade 0-1 |
| Grade 4† | Permanent withdrawal |
| Thrombopenia | Grade 3 | Suspend drug until recover to Grade 0-1 |
| Grade 4 | Permanent withdrawal |
| Other irAEs | Grade 3-4 elevated blood amylase or lipase  Grade 2-3 pancreatitis  Grade 2 myocarditis  Grade 2-3 other irAEs for the first time | Suspend drug until recover to Grade 0-1 |
| Grade 4 pancreatitis or recurrent pancreatitis  Grade 3-4 myocarditis  Grade 3-4 encephalitis  Grade 4 other irAEs for the first time | Permanent withdrawal |
| Recurrent or persistent AEs | Recurrent Grade 3-4  Grade 2 or 3 AEs did not recurrent to grade 0-1 within 12 weeks of the last treatment | Permanent withdrawal |
| infusion reaction | Grade 2 | Slow down the drip rate or suspend the drug |
| Grade 3-4 | Permanent withdrawal |
| Note:  * For patients with reactive capillary endothelial proliferation in mucous membrane-related sites such as the oral cavity or nasal cavity that cause bleeding symptoms, symptomatic support should be provided and camrelizumab should be suspended and resumed when the aforementioned reactive capillary endothelial proliferation in mucous membrane sites has resolved or when no risk of potential major bleeding (>100 ml) has been assessed by the investigators.  † Considering the diversity of causes of rash reactions during combination drug administration, the established treatment regimen was maintained for patients who experienced grade 4 rash reactions that subsided after one week using symptomatic treatment. Patients whose rash reactions persisted for more than two weeks without complete remission, camrelizumab was suspended and chemotherapy drugs continued; and a second cautious attempt may be considered after complete resolution of symptoms evaluated by the investigators and after full communication with the patient.  a. For subjects experiencing intolerable or persistent grade 2 drug-related adverse events, the investigator may suspend camrelizumab as appropriate; if the persistent grade 2 adverse reaction fails to recover to grade 1 or below within 12 weeks after the last dose, the medication should be terminated.  b. In the event of any recurrent grade 3 drug-related AE or any life-threatening event, the medication should be terminated. | | |

# **Concomitant Medication or Treatment**

## **Application of Antiemetic Drugs**

1. Preventive antiemetic therapy: 5-HT3 antagonist given 1 hour before chemotherapy.
2. Delayed vomiting: metoclopramide 20 mg BID and the NK-1 receptor antagonist aprepitant (125 mg, 80 mg, and 80 mg for day 1-3, respectively) were recommended. The 5-HT3 antagonist can replace metoclopramide.

## **Application of Granulocyte Colony-stimulating Factor (G-CSF)**

The use of G-CSF is not advocated for primary prevention; when white blood cell count (WBC) and/or ANC are significantly reduced, G-CSF treatment can be given according to the judgments of clinicians; if grade 3 or 4 neutropenia or fever (oral temperature > 38.3°C or > 37.8°C lasting for more than one hour) is noted, the following regimens are excepted for dose adjustment. Secondary prevention can also be given; the use of G-CSF should be more than 24 hours away from the end of chemotherapy drugs. Polyethylene glycol-conjugated recombinant human granulocyte stimulating factor is an alternative agent for the prevention of serious neutropenia.

## **Combined drug usage and treatment**

### **7.3.1 Permissible Treatment**

Supportive treatment, including pain treatment, blood transfusion, intravenous nutrition, etc.

### **7.3.2 Inadmissible Treatment**

During the study period, patients could not accept other experimental drugs and any other form of radiotherapy and chemotherapy, but the follow-up anticancer treatment for patients who fails to follow the treatment plan is not limited.

# **Observation and Assessment During Treatment**

The following items need to be assessed during the treatment period:

1. Nasopharynx and neck MRI and nasopharyngeal endoscopy will be performed before and after induce chemotherapy and at the end of radiotherapy, and complete response (CR), partial response (PR), stable disease (SD) or progressive disease (PD) will be evaluated with the Response Evaluation Criteria in Solid Tumors (RECIST) version 1.1. Chest CT and abdominal CT/MR will be reexamined after treatment.
2. General conditions.
3. Acute and late toxicity assessment, including hematological toxicity, gastrointestinal reactions, hepatotoxicity, nephrotoxicity, mucositis, neurotoxicity, ototoxicity, etc.
4. Immune-related toxicity assessment.
5. Laboratory tests: Routine blood tests and blood biochemistry are required on day 0, day 8, and day 15 of chemotherapy for each cycle; the following tests are routinely suggested but not mandated before each cycle of immunotherapy: thyroid function (TSH, FT3, FT4), coagulation function (APTT, PT, FIB, INR, D-D), serum amylase, lipase, myocardial enzyme profile, hypersensitivity troponin, brain natriuretic peptide, inflammatory cytokine profile, etc.
6. Indirect nasopharyngoscopy will be performed to examine the tumor in the nasopharynx every week, and the regression of enlarged lymph nodes should be observed and measured. Nasal endoscopy will be performed before and after the treatment course and is also required after each cycle of chemotherapy or immunotherapy.

# **Exploratory analysis and translational study**

## Exploratory analysis

Pathologic evaluation of endoscopic biopsy and/or lymph nodes biopsy after induction phase would be conducted. The primary efficacy endpoint was DMFS, which was defined as the interval between the initial treatment and distant failure.

EBV DNA clearance rate.

## Translational study

1. Signed informed consent is required prior to each biological sample collection.
2. Tissue specimens from nasopharyngeal and/or neck mass biopsies or fine needle aspiration prior to treatment and after induction therapy, or from recurrence or metastasis site if recurrent or metastasis event occurred.
3. Blood samples, collected at the following time points: before treatment, after induction therapy, the end of radiotherapy, the end of maintain phase, and the time point of distant metastasis or recurrence events.
4. Clinical specimens for the above cases whose informed consent have been signed will be collected by designated professionals, and all specimens collected will be used for subject-related scientific research only.
5. After collection, tumor tissue specimens will be collected by the principal investigator and stored in a refrigerator at -80 °C or transferred to a designated laboratory for processing and analysis.
6. Hematology specimens are collected, centrifuged, and stored by the principal investigator, or transferred to the designated laboratory for biological sample processing and analysis.

# **Safety Evaluation**

## **Adverse Event Indicators**

Toxicity evaluation should be performed weekly during the treatment and four weeks after the end of treatment. All observations relevant to the safety of the drug under study will be documented in the case report form (CRF) and the final summary report. Safety indicators are as follows: adverse events, laboratory changes (hematology, blood biochemistry), changes in vital signs (blood pressure, heart rate, respiratory rate, body temperature), and changes in electrocardiogram and chest CT.

## **Severe Adverse Events (SAEs)**

A SAE is any life-threatening medical adverse event that occurs at a variety of drug doses:

1. Causing death or endangering life. It should be noted that the term "life-threatening" in the definition of "severe" means that at the time of the event, the patient is at risk of death. It's not a hypothetical event.
2. Causing permanent or severe disability/dysfunction.
3. Teratogenicity/birth defects.
4. Resulting in prolonged hospital stays.
5. Lead to secondary tumors.
6. Other unpredictable drug related AEs

In the event of a serious adverse event, regardless of whether it is related to the study drug, the investigator should immediately notify the Clinical Research Center (GCP) of the table of serious adverse events within 1 business day (in any case). The form must be dated and signed by the person who filled it

All adverse events, whether or not considered drug related, should be documented on the case report, including diagnosis, start/end time, intervention taken, discontinuation of treatment, salvage measure, outcome, and other possible causes. The investigators should determine the relationship of all adverse events to treatment and the severity of the events. The severity of acute adverse events should be graded according to CTC AE (version 5.0). The most severe severity should be recorded in the CRF.

## **Record of Events**

All adverse events, whether or not considered drug related, should be documented on the case report, including diagnosis, start/end time, intervention taken, discontinuation of treatment, salvage measure, outcome, and other possible causes. The investigators should determine the relationship of all adverse events to treatment and the severity of the events. The severity of acute adverse events should be graded according to CTC AE (version 5.0). The most severe severity should be recorded in the CRF.

# **Follow Up**

After completion of radiotherapy, patients are followed up every 3 months during the first 3 years and every 6 months thereafter until death. The nasopharynx will be assessed by endoscopy approximately 4 weeks after completion of radiotherapy. Further investigations with MRI or CT will be arranged 3 months after completion of radiotherapy. Other follow-up items include physical examination, blood examination, chest CT, abdominal MR or CT, etc. Treatment responses are also evaluated according to the RECIST, version 1.1. If residual disease is found, whether to treat and which treatment modalities to be employed will be decided by individual clinician. For statistical purpose, any residual disease found 12 weeks after completion of RT will be considered as local failure. Similarly, any residual nodal disease within 12 weeks after RT is considered as regional failure.

Clinical diagnosis is accepted for sites not easily accessible if classical changes are shown on imaging. The dates of diagnosis of local, nodal, and distant failure will be recorded. The earliest date of detecting symptomatic late onset toxicities and the eventual maximum grade by the Late Radiation Morbidity Scoring Criteria of the Radiation Therapy Oncology Group (RTOG) and European Organization for Research and Treatment of Cancer (EORTC) should be recorded. All patients will be followed-up until death and cause of death recorded. Deaths due to unknown cause are counted as death due to NPC if disease is still present at last assessment.

# **Safety Measures and Quality Control**

1. Researchers is responsible for obtaining informed consent signed by each subject or his or her agent; carefully fill out the case report form; complete records of laboratory examinations, clinical records, and original medical records of the subjects.
2. Make monitoring plan of adverse effects and emergency plan.
3. Research plan is made by all investigators and approved by Ethics Committee.
4. Develop all kinds of standard operation procedures related to this study.
5. Establish standardized evaluation system to unify diagnostic criteria, curative effect judging criteria, etc.
6. Establish professional statistical plan.
7. Research staffs are trained before the study.
8. Arrange quality controller, make quality control plan and check regularly.
9. Set up coordination committee, curative effect judging group and follow-up team.

# **Data Collection and Data Management**

## **Case Report Form (CRF)**

The CRF is completed by the investigator and must be completed by each enrolled patient. After the completed CRF is reviewed by the clinical supervisor, the first copy is transferred to the data administrator for data entry and management.

## **Data Entry and Modification**

All information about the enrolled patients after registration will be sent to Sun Yat-Sen University Cancer Center for management. We have stewards taking charge of data entry and management. Data administrators use EpiData 3.1 software to compile data entry program and carry out data entry and management. In order to ensure the accuracy of the data, two data administrators should independently conduct double input and proofreading. If there are any questions in the CRF, the data administrator will send questioned data to the investigator for verification. The investigator should answer and return the questions as soon as possible. The data administrator can modify, confirm and enter the data according to the answers of the investigator.

## **Data Locking**

After confirming that the established database is accurate, the main researchers, data administrators, and statisticians will lock the data. The locked data file will not be modified.

# **Statistical Analysis**

## **Endpoint Definitions**

### **Primary End Point**

The primary endpoint was DMFS, which was defined as the time from the initiation of treatment to documented distant metastasis.

### **Secondary End Points**

Response rate. Approximately one week after completing induction therapy, the responses to induction therapy are assessed by imaging by independent image committee. The nasopharynx and cervical nodes should be assessed by endoscopy and MRI or CT at approximately 12 weeks after completion of radiotherapy. Other examinations included chest CT, abdominal CT/MR, and bone scans. Tumor response is classified according to the RECIST criteria, version 1.1. Complete response is defined as the disappearance of all target lesions. Any pathological lymph nodes (whether target or nontarget) must have been reduced in the short axis to <10 mm. Partial response is defined as an at least 30% decrease in the sum of diameters of the target lesions, with the baseline diameter sum serving as the reference. Progressive disease is defined as an at least 20% increase in the sum of diameters of the target lesions, with the smallest sum during study serving as the reference (including the baseline sum). In addition to a relative increase of 20%, the sum must also demonstrate an absolute increase of at least 5 mm. Stable disease is defined as both insufficient size reduction to qualify as partial response and an insufficient increase to be considered progressive disease, with the smallest diameter sum during the study serving as the reference.

PFS, which is defined as the time from the initiation of induction therapy to documented distant metastasis, locoregional recurrence, or death from any cause, whichever occurred first

OS, which is defined as the time from the initiation of induction therapy to any-cause death.

LRFS, which is defined as the time from the initiation of induction therapy to documented locoregional recurrence.

Treatment toxicity. The incidence of serious toxicity (treatment-related adverse events and immune-related adverse events) during induction phase, radiotherapy phase, and maintain phase, late adverse events, compliance to treatment were included. Adverse events refer to any adverse medical events that occur on the patient. They do not necessarily have a causal relationship with treatment. Investigators should keep a detailed record of any adverse events that occur in the patients. The record of adverse events shall include a description of the adverse events, the time of occurrence, severity, duration, measures taken, and the final outcomes. Investigators should assess the possible association between the adverse events and the tested drugs according to the five-level classification of "positive relevance, possible irrelevance, positive irrelevance, and inability to determine." Treatment-related adverse events are assessed according to NCI-CTCAE version 5.0. Acute toxicities include hematological toxicity, mucositis, allergic reactions and other adverse events and serious adverse events. The severity of immune-related adverse events was graded according to the NCI-CTCAE version 5.0. The severity of late adverse events was graded according to the Radiation Therapy Oncology Group and European Organization for Research and Treatment of Cancer late radiation morbidity scoring scheme.

Quality of life. EORTC QLQ-C30 and QLQ-H&N35 (v1.0) are used to assess life quality of patients, and the change of their life quality is recorded and evaluated weekly from before the beginning of treatment to the last dose of the camrelizumab.

## **Determination of the Sample Size**

Considering over half distant metastasis events occurred within one year after radical treatment, the primary endpoint of this study was the DMFS at the time point of 1 year. The following set of hypotheses were considered:

H0: The maximum 1-year DMFS rate of treatment cohort is not more than 76%;

HA: The minimum 1-year DMFS rate of treatment cohort is not less than 90%.

The historical data estimation is based on the prognostic data of N3 population reported from our center.13 According to the Fleming single-stage design, the maximum effective rate (P0) was 76%, the minimum effective rate (P1) was 90%, unilateral α was set as 0.05, and the power was set at least 80%, 46 patients should be enrolled. Assuming an 8% dropout rate, we estimated that the study would need to include a total of 50 patients. If 7 of the first 46 evaluable patients failed, the DMFS rate would be considered unacceptable, and the regimen would be declared promising if at least 40 successes of the first 46 evaluable patients were observed.

## **Analytical Approach**

The therapeutic effects will be analyzed by both full analysis set (intention-to-treat) and per-protocol set. Patients who completed radical radiotherapy and at least one dose of induction therapy were included in the per-protocol analysis set. Safety analysis will be performed in safety population, which is made up of eligible cases that received at least one dose of protocol-defined treatment.

The study results will be reported after universal 1-year follow-up (for the primary endpoint analysis), 2-year and/or 3-year follow-up, and 5-year follow-up (for the long-term results).

# **Ethical Considerations**

This study must be approved by an appropriate institutional ethic committee.

An informed consent must be obtained from individual patients. Copy of the Consent Form, contact number of investigator and ethics committee will be available to patient on request.

All serious and unexpected adverse events or death related to the drugs or radiotherapy must be reported to the study coordinator immediately. Serious adverse events (SAE) to be reported include all deaths during or within 30 days of protocol treatment regardless of cause, grade 5 toxicity, life-threatening grade 4 toxicity, and/or unexpected toxicity. The Study Coordinator of respective center should complete form and fax this within 24 hours to the Principal Investigator (Dr. Yan-Qun Xiang, Tel: 020-87343379, Fax: 020-87343379), the center of clinical trials, the institutional ethic committee and Sun Yat-Sen University Cancer Center. Together with the Principal Investigator, appropriate and prompt action will be taken if warranted. Reactions and deaths beyond 30 days from protocol treatment that are judged definitely unrelated to treatment should not be reported.

# **Administration of Experimental Drugs**

Jiangsu Hengrui Pharmaceutical provided nab-paclitaxel and apatinib free of charge and camrelizumab free of partial charge. The management, distribution, and recovery of clinical drugs in this trial shall be the responsibility of designated researcher. The researcher must ensure that all trial drugs are used only for subjects participating in the clinical trial, that their doses and usage are in accordance with the trial scheme, and that the remaining drugs are returned to the manufacturer. Experimental drugs should not be transferred to any non-clinical trial participant.

# **Progress of Study**

Expected trial start time: May 2020;

Expected completion time: May 2021;

Expected end of trial: May 2026.

# **Principle center and investigator**

Principle center: Sun Yat-Sen University Cancer Center

Principle Investigator: Yan-Qun Xiang

Address: Dongfeng East Road 651, Guangzhou 510060

Telephone: 020-87343379

Fax: 020-87343379

# **Bibliography**

1. Chen YP, Chan ATC, Le QT, Blanchard P, Sun Y, Ma J. Nasopharyngeal carcinoma. Lancet (London, England) 2019;394:64-80.

2. Huang ZL, Liu S, Wang GN, et al. The prognostic significance of PD-L1 and PD-1 expression in patients with nasopharyngeal carcinoma: a systematic review and meta-analysis. Cancer Cell Int 2019;19:141.

3. Mai HQ, Chen QY, Chen D, et al. Toripalimab or placebo plus chemotherapy as first-line treatment in advanced nasopharyngeal carcinoma: a multicenter randomized phase 3 trial. Nature medicine 2021;27:1536-43.

4. Wang FH, Wei XL, Feng J, et al. Efficacy, Safety, and Correlative Biomarkers of Toripalimab in Previously Treated Recurrent or Metastatic Nasopharyngeal Carcinoma: A Phase II Clinical Trial (POLARIS-02). Journal of clinical oncology : official journal of the American Society of Clinical Oncology 2021;39:704-12.

5. Fang W, Yang Y, Ma Y, et al. Camrelizumab (SHR-1210) alone or in combination with gemcitabine plus cisplatin for nasopharyngeal carcinoma: results from two single-arm, phase 1 trials. The Lancet Oncology 2018;19:1338-50.

6. Yang Y, Qu S, Li J, et al. Camrelizumab versus placebo in combination with gemcitabine and cisplatin as first-line treatment for recurrent or metastatic nasopharyngeal carcinoma (CAPTAIN-1st): a multicentre, randomised, double-blind, phase 3 trial. The Lancet Oncology 2021;22:1162-74.

7. Schmittnaegel M, Rigamonti N, Kadioglu E, et al. Dual angiopoietin-2 and VEGFA inhibition elicits antitumor immunity that is enhanced by PD-1 checkpoint blockade. Science translational medicine 2017;9.

8. Allen E, Jabouille A, Rivera LB, et al. Combined antiangiogenic and anti-PD-L1 therapy stimulates tumor immunity through HEV formation. Science translational medicine 2017;9.

9. Xu J, Zhang Y, Jia R, et al. Anti-PD-1 Antibody SHR-1210 Combined with Apatinib for Advanced Hepatocellular Carcinoma, Gastric, or Esophagogastric Junction Cancer: An Open-label, Dose Escalation and Expansion Study. Clinical cancer research : an official journal of the American Association for Cancer Research 2019;25:515-23.

10. Li Q, Wang Y, Jia W, et al. Low-Dose Anti-Angiogenic Therapy Sensitizes Breast Cancer to PD-1 Blockade. Clinical cancer research : an official journal of the American Association for Cancer Research 2020;26:1712-24.

11. Liu J, Liu Q, Li Y, et al. Efficacy and safety of camrelizumab combined with apatinib in advanced triple-negative breast cancer: an open-label phase II trial. J Immunother Cancer 2020;8.

12. Xie L, Xu J, Sun X, et al. Apatinib plus camrelizumab (anti-PD1 therapy, SHR-1210) for advanced osteosarcoma (APFAO) progressing after chemotherapy: a single-arm, open-label, phase 2 trial. J Immunother Cancer 2020;8.

13. Sun X, Su S, Chen C, et al. Long-term outcomes of intensity-modulated radiotherapy for 868 patients with nasopharyngeal carcinoma: an analysis of survival and treatment toxicities. Radiotherapy and oncology : journal of the European Society for Therapeutic Radiology and Oncology 2014;110:398-403.

# **Appendix I: The 8th editions of the AJCC Staging System of Nasopharyngeal Carcinoma**

| **Tumor stage** | |
| --- | --- |
| Tx | Primary tumour cannot be assessed |
| T0 | No tumour identified, but there is EBV-positive cervical node(s) involvement |
| T1 | Nasopharynx, oropharynx, or nasal cavity without parapharyngeal extension |
| T2 | Parapharyngeal extension, adjacent soft tissue involvement (medial pterygoid, lateral pterygoid, prevertebral muscles) |
| T3 | Bony structures (skull base, cervical vertebra) and/or paranasal sinuses |
| T4 | Intracranial extension, cranial nerve, hypopharynx, orbit, extensive soft tissue involvement (beyond the lateral surface of the lateral pterygoid muscle, parotid gland) |
| **Node stage** | |
| Nx | Regional lymph nodes cannot be assessed |
| N0 | No regional lymph node metastasis |
| N1 | Unilateral cervical, unilateral, or bilateral retropharyngeal lymph nodes, above the caudal border of cricoid cartilage; ≤ 6 cm |
| N2 | Bilateral metastasis in lymph node(s), ≤ 6 cm in greatest dimension, above the caudal border of cricoid cartilage |
| N3 | > 6 cm and/or below caudal border of cricoid cartilage (regardless of laterality) |
| **Metastasis** | |
| M0 | No distant metastasis |
| M1 | Distant metastasis |
| **TNM stage** | |
| I | T1 N0 M0 |
| II | T2 N0–1 M0, T0–1 N1 M0 |
| III | T3 N0–2 M0, T0–2 N2 M0 |
| IVa | T4 or N3 M0 |
| IVb | Any T, any N, M1 |

# **Appendix II: ECOG Performance Status and Scores**

| **Score** | **ECOG Performance status*** |
| --- | --- |
| 0 | Fully active, able to carry on all pre-disease performance without restriction |
| 1 | Restricted in physically strenuous activity but ambulatory and able to carry out work of a light or sedentary nature, e.g., light housework, office work |
| 2 | Ambulatory and capable of all selfcare but unable to carry out any work activities; up and about more than 50% of waking hours |
| 3 | Capable of only limited selfcare; confined to bed or chair more than 50% of waking hours |
| 4 | Completely disabled; cannot carry on any selfcare; totally confined to bed or chair |
| 5 | Dead |
| * Oken M, Creech R, Tormey D, et al. Toxicity and response criteria of the Eastern Cooperative Oncology Group. Am J Clin Oncol. 1982;5:649-655.  Note: ECOG denotes Eastern Cooperative Oncology Group | |

# **Appendix III:** **Acute Induction Chemotherapy and Chemoradiotherapy Toxicity Graded by Common Terminology Criteria for Adverse Events (CTCAE 5.0).**

The CTCAE v5.0 manual can be found at the following URL: https://evs.nci.nih.gov/ftp1/CTCAE/CTCAE_5.0/

# **Appendix IV: Late Onset Toxicities Graded by RTOG/EORTC System**

RTOG/EORTC System manual can be found at the following URL: https://www.eortc.org/rog-guidelines/

# Summary of changes in protocol

| Page | Summary | Changes |
| --- | --- | --- |
| 56 | We added detailed information of the usage of camrelizumab. | In particular, an actual dose of 3 mg/kg was given to those weighing less than 40 kg. |
| 56 | Based on the tolerability of the enrolled patients, we modified the initial dosage of apatinib. | Apatinib taken orally at a dose of 250 mg daily on days 1 to 5 per week for a total of 8 weeks. |
| 66 | Due to the adjustment initial dosage of apatinib, we deleted description of the first adjustment dosage correspondingly. | ~~250 mg daily,~~ ~~5 days every week for the first adjustment;~~ |
| 67 | We added detailed information of the dosage adjustment of apatinib. | For patients with symptoms of any-reason nosebleed, apatinib should be suspended until the bleeding disappears and apatinib can be continued without dose adjustment. |
| 70 | We added detailed information of the dosage adjustment of camrelizumab. | For patients with reactive capillary endothelial proliferation in mucous membrane-related sites such as the oral cavity or nasal cavity that cause bleeding symptoms, symptomatic support should be provided and camrelizumab should be suspended and resumed when the aforementioned reactive capillary endothelial proliferation in mucous membrane sites has resolved or when no risk of potential major bleeding (>100 ml) has been assessed by the investigators. |
| 70 | We added detailed information of the dosage adjustment of camrelizumab. | Considering the diversity of causes of rash reactions during combination drug administration, the established treatment regimen was maintained for patients who experienced grade 4 rash reactions that subsided after one week using symptomatic treatment. Patients whose rash reactions persisted for more than two weeks without complete remission, camrelizumab was suspended and chemotherapy drugs continued; and a second cautious attempt may be considered after complete resolution of symptoms evaluated by the investigators and after full communication with the patient. |

# Original statistical analysis plan

**1 Statistical Analysis**

**1.1 Endpoint Definitions**

**1.1.1 Primary End Point**

The primary endpoint was DMFS, which was defined as the time from the initiation of treatment to documented distant metastasis.

**1.1.2 Secondary End Points**

Response rate. Approximately one week after completing induction therapy, the responses to induction therapy are assessed by imaging by independent image committee. The nasopharynx and cervical nodes should be assessed by endoscopy and MRI or CT at approximately 12 weeks after completion of radiotherapy. Other examinations included chest CT, abdominal CT/MR, and bone scans. Tumor response is classified according to the RECIST criteria, version 1.1. Complete response is defined as the disappearance of all target lesions. Any pathological lymph nodes (whether target or nontarget) must have been reduced in the short axis to <10 mm. Partial response is defined as an at least 30% decrease in the sum of diameters of the target lesions, with the baseline diameter sum serving as the reference. Progressive disease is defined as an at least 20% increase in the sum of diameters of the target lesions, with the smallest sum during study serving as the reference (including the baseline sum). In addition to a relative increase of 20%, the sum must also demonstrate an absolute increase of at least 5 mm. Stable disease is defined as both insufficient size reduction to qualify as partial response and an insufficient increase to be considered progressive disease, with the smallest diameter sum during the study serving as the reference.

PFS, which is defined as the time from the initiation of induction therapy to documented distant metastasis, locoregional recurrence, or death from any cause, whichever occurred first

OS, which is defined as the time from the initiation of induction therapy to any-cause death.

LRFS, which is defined as the time from the initiation of induction therapy to documented locoregional recurrence.

Treatment toxicity. The incidence of serious toxicity (treatment-related adverse events and immune-related adverse events) during induction phase, radiotherapy phase, and maintain phase, late adverse events, compliance to treatment were included. Adverse events refer to any adverse medical events that occur on the patient. They do not necessarily have a causal relationship with treatment. Investigators should keep a detailed record of any adverse events that occur in the patients. The record of adverse events shall include a description of the adverse events, the time of occurrence, severity, duration, measures taken, and the final outcomes. Investigators should assess the possible association between the adverse events and the tested drugs according to the five-level classification of "positive relevance, possible irrelevance, positive irrelevance, and inability to determine." Treatment-related adverse events are assessed according to NCI-CTCAE version 5.0. Acute toxicities include hematological toxicity, mucositis, allergic reactions and other adverse events and serious adverse events. The severity of immune-related adverse events was graded according to the NCI-CTCAE version 5.0. The severity of late adverse events was graded according to the Radiation Therapy Oncology Group and European Organization for Research and Treatment of Cancer late radiation morbidity scoring scheme.

Quality of life. EORTC QLQ-C30 and QLQ-H&N35 (v1.0) are used to assess life quality of patients, and the change of their life quality is recorded and evaluated weekly from before the beginning of treatment to the last dose of the camrelizumab.

**1.2 Determination of the Sample Size**

Considering over half distant metastasis events occurred within one year after radical treatment, the primary endpoint of this study was the DMFS at the time point of 1 year. The following set of hypotheses were considered:

H0: The maximum 1-year DMFS rate of treatment cohort is not more than 76%;

HA: The minimum 1-year DMFS rate of treatment cohort is not less than 90%.

The historical data estimation is based on the prognostic data of N3 population reported from our center.13 According to the Fleming single-stage design, the maximum effective rate (P0) was 76%, the minimum effective rate (P1) was 90%, unilateral α was set as 0.05, and the power was set at least 80%, 46 patients should be enrolled. Assuming an 8% dropout rate, we estimated that the study would need to include a total of 50 patients. If 7 of the first 46 evaluable patients failed, the DMFS rate would be considered unacceptable, and the regimen would be declared promising if at least 40 successes of the first 46 evaluable patients were observed.

**1.3 Analytical Approach**

The therapeutic effects will be analyzed by both full analysis set (intention-to-treat) and per-protocol set. Patients who completed radical radiotherapy and at least one dose of induction therapy were included in the per-protocol analysis set. Safety analysis will be performed in safety population, which is made up of eligible cases that received at least one dose of protocol-defined treatment.

The study results will be reported after universal 1-year follow-up (for the primary endpoint analysis), 2-year and/or 3-year follow-up, and 5-year follow-up (for the long-term results).
